# Supplementary material
Source: PubMed Central journal article supplement (PMC7006965)
Supplement: ac9b00971_si_001.pdf [file ac9b00971_si_001.pdf]

# Direct mass spectrometry analysis of protein complexes and intact proteins up to >70 kDa from tissue

---

Rian L. Griffiths<sup>1#</sup>, Albert Konijnenberg<sup>2</sup>, Rosa Viner<sup>3</sup> and Helen J. Cooper<sup>1\*</sup>

<sup>1</sup>School of Biosciences, University of Birmingham, Edgbaston, Birmingham B15 2TT, UK.

<sup>2</sup>Thermo Fisher Scientific, Achtseweg Noord 5, 5651 GG Eindhoven, The Netherlands

<sup>3</sup>Thermo Fisher Scientific, River Oaks Parkway 355, San Jose, 95134, California, U.S.A

#Current address: School of Pharmacy, University of Nottingham, University Park, Nottingham NG7 2RD, UK.

\*To whom correspondence should be addressed: [h.j.cooper@bham.ac.uk](mailto:h.j.cooper@bham.ac.uk)

## Supplementary Information:

**Supplemental Figure 1.** Comparison of deconvoluted native LESA mass spectra from **A)** two separate cerebellum locations sampled with 10 mM ammonium acetate, 5% MeOH; **B)** two separate cerebellum locations sampled with 10 mM ammonium acetate, 0.125% C8E4; **C)** two separate cerebellum locations one sampled with 10 mM ammonium acetate, 5% MeOH and one with 10 mM ammonium acetate, 0.125% C8E4; **D)** one cerebellum location and one cerebral cortex location sampled with 10 mM ammonium acetate, 0.125% C8E4; **E)** two separate medulla (kidney) locations one sampled with 10 mM ammonium acetate, 0.125% C8E4; **F)** one medulla (kidney) location and one cortex (kidney) location sampled with 10 mM ammonium acetate, 0.125% C8E4.

**Supplemental Figure 2.** Native LESA MS of rat brain tissue. A) Sampling location: cerebral cortex. LESA extraction/ionisation solvent: 10 mM ammonium acetate, 5% MeOH. B) Detail from main figure 1C. Sampling location cerebral cortex. LESA extraction/ionisation solvent: 10 mM ammonium acetate, 0.125% C8E4.

**Supplemental Figure 3.** Native LESA MS of rat kidney tissue. Sampling location: outer cortex. LESA extraction/ionisation solvent: 10 mM ammonium acetate, 5% MeOH.

**Supplemental Figure 4.** Native LESA HCD MS/MS of rat kidney tissue. Sampling location: outer cortex. LESA extraction/ionisation solvent: 10 mM ammonium acetate, 5% MeOH. HCD energy = 80%.

**Supplemental File 1:** Biopharma Finder search parameters and outputs for LESA mass spectrum shown in Fig 1A. (Cerebellum, 10 mM ammonium acetate, 5% MeOH).

**Supplemental File 2:** Biopharma Finder search parameters and outputs for LESA mass spectrum obtained from separate cerebellum location (Cerebellum, 10 mM ammonium acetate, 5% MeOH).

**Supplemental File 3:** Biopharma Finder search parameters and outputs for LESA mass spectrum shown in Fig 1B. (Cerebellum, 10 mM ammonium acetate, 0.125% C8E4).

**Supplemental File 4:** Biopharma Finder search parameters and outputs for LESA mass spectrum shown in Fig 1C. (Cerebral cortex, 10 mM ammonium acetate, 0.125% C8E4).

**Supplemental File 5:** Biopharma Finder search parameters and outputs for LESA mass spectrum shown in Fig 2A. (Kidney outer cortex, 10 mM ammonium acetate, 0.125% C8E4).

**Supplemental File 6:** Biopharma Finder search parameters and outputs for LESA mass spectrum shown in Suppl Fig 3. (Kidney outer cortex, 10 mM ammonium acetate, 5% MeOH).

**Supplemental File 7:** Biopharma Finder search parameters and outputs for LESA mass spectrum shown in Fig 2C. (Kidney medulla, 10 mM ammonium acetate, 0.125% C8E4).

**Supplemental File 8:** Biopharma Finder search parameters and outputs for LESA mass spectrum obtained from a separate medulla location. (Kidney medulla, 10 mM ammonium acetate, 0.125% C8E4).

**A)**

NativeLESA\_method\_glassslide\_undosed\_brain\_5pMeOH\_P4\_run2.RAW ReSpect™ (Isotopically Unresolved) NL: 7.60E+006  
 NativeLESA\_method\_glassslide\_undosed\_brain\_5pMeOH\_P4\_run2.RAW

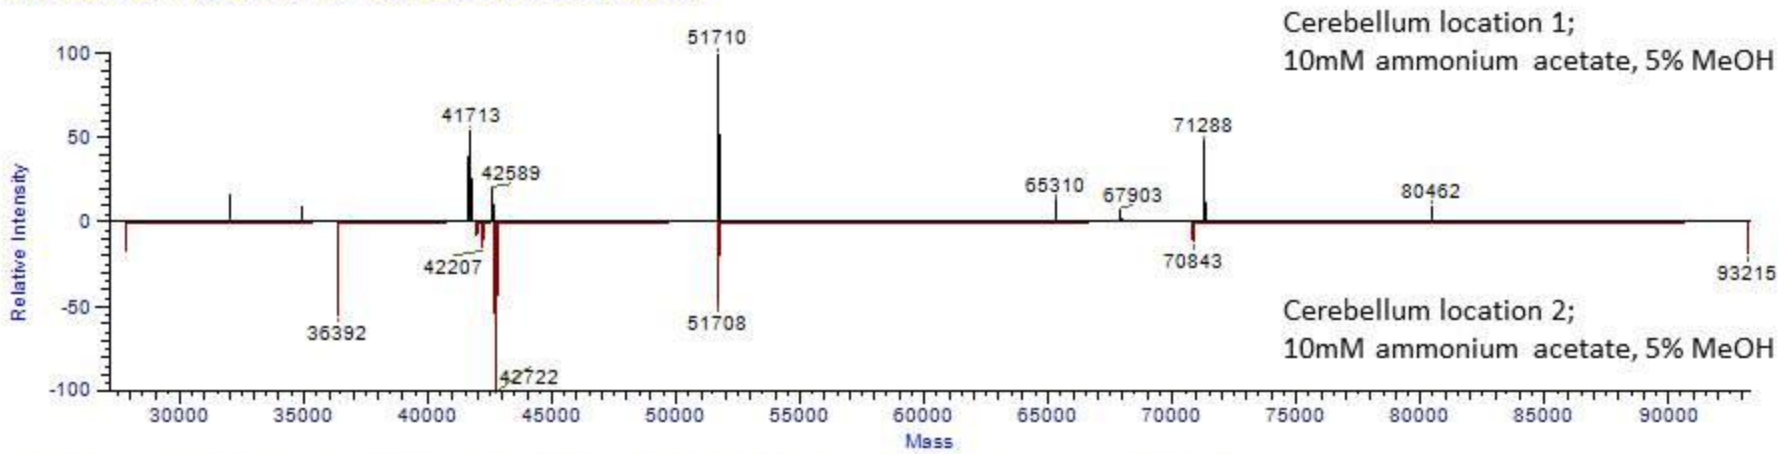

NativeLESA\_method\_glassslide\_undosed\_brain\_5pMeOH\_P7\_run20.RAW ReSpect™ (Isotopically Unresolved) NL: 7.32E+006  
 NativeLESA\_method\_glassslide\_undosed\_brain\_5pMeOH\_P7\_run20.RAW

**B)**

NativeLESA\_method\_glassslide\_rat\_brain\_5pMeOH\_P4\_run11.RAW ReSpect™ (Isotopically Unresolved) NL: 6.55E+006  
 NativeLESA\_method\_glassslide\_rat\_brain\_5pMeOH\_P4\_run11.RAW

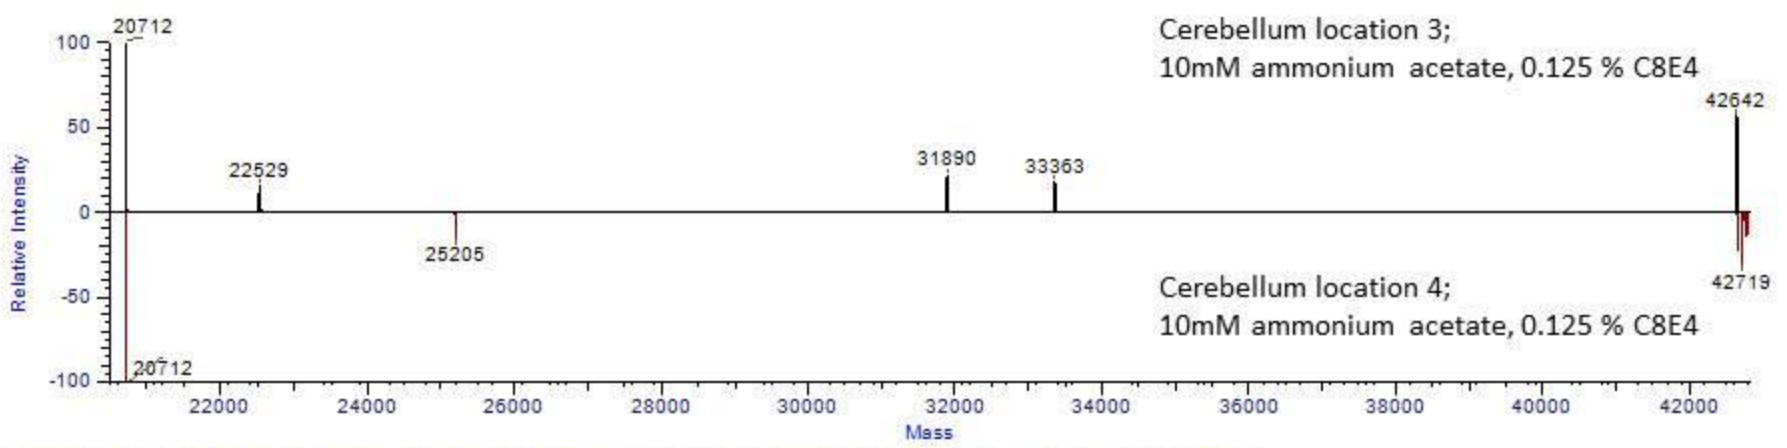

NativeLESA\_method\_glassslide\_undosed\_brain\_5pMeOH\_P7\_run19.RAW ReSpect™ (Isotopically Unresolved) NL: 7.11E+006  
 NativeLESA\_method\_glassslide\_undosed\_brain\_5pMeOH\_P7\_run19.RAW

**Supplemental Figure 1.** Comparison of deconvoluted native LESA mass spectra from **A)** two separate cerebellum locations sampled with 10 mM ammonium acetate, 5% MeOH and **B)** two separate cerebellum locations sampled with 10 mM ammonium acetate, 0.125% C8E4

C)

NativeLESA\_method\_glassslide\_undosed\_brain\_5pMeOH\_P4\_run2.RAW ReSpect™ (Isotopically Unresolved) NL: 7.60E+006  
 NativeLESA\_method\_glassslide\_undosed\_brain\_5pMeOH\_P4\_run2.RAW

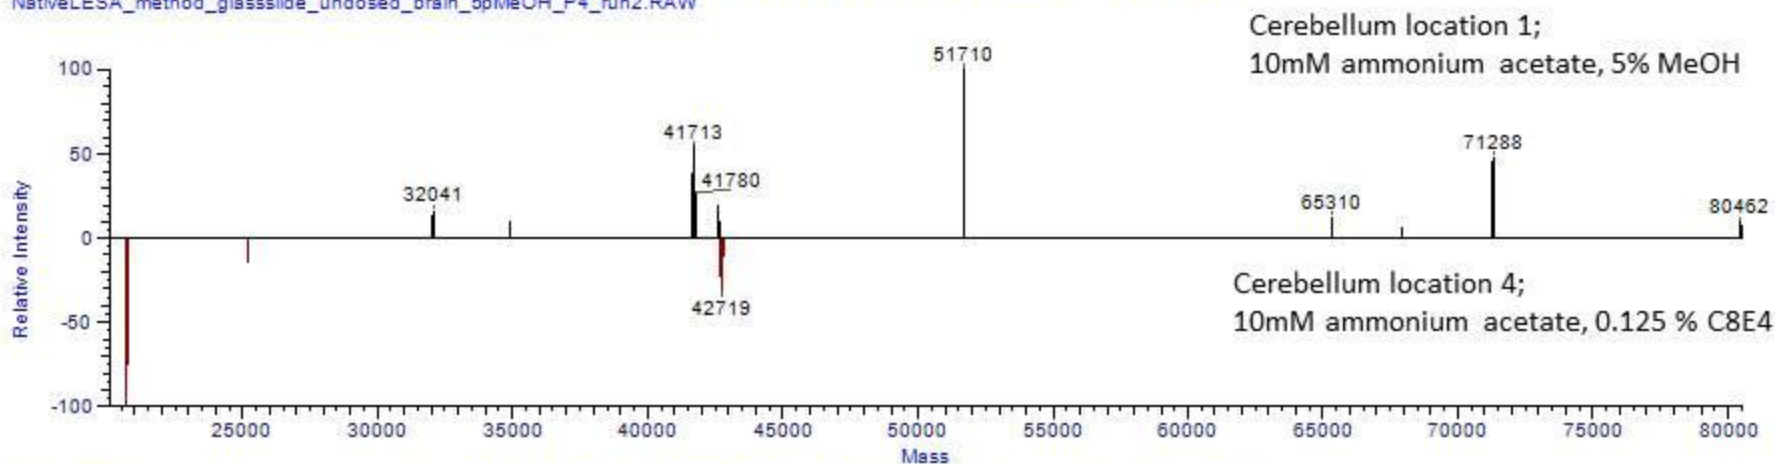

NativeLESA\_method\_glassslide\_undosed\_brain\_5pMeOH\_P7\_run19.RAW ReSpect™ (Isotopically Unresolved) NL: 7.11E+006  
 NativeLESA\_method\_glassslide\_undosed\_brain\_5pMeOH\_P7\_run19.RAW

D)

NativeLESA\_method\_glassslide\_\_rat\_brain\_5pMeOH\_P4\_run8.RAW ReSpect™ (Isotopically Unresolved) NL: 1.41E+007  
 NativeLESA\_method\_glassslide\_\_rat\_brain\_5pMeOH\_P4\_run8.RAW

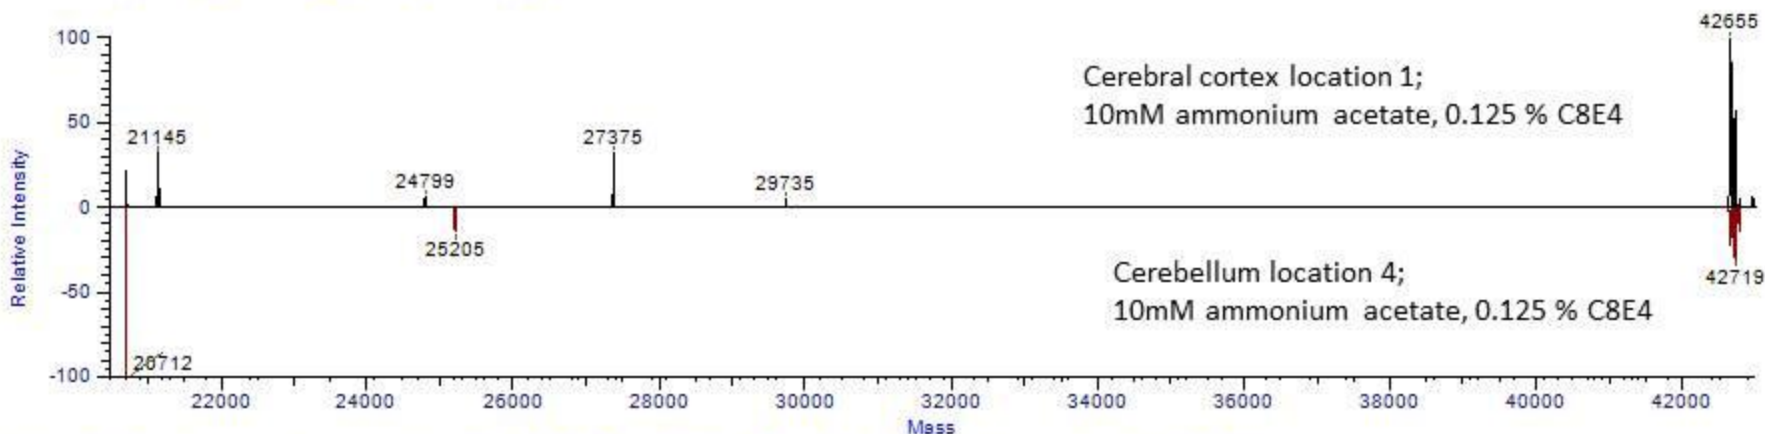

NativeLESA\_method\_glassslide\_undosed\_brain\_5pMeOH\_P7\_run19.RAW ReSpect™ (Isotopically Unresolved) NL: 7.11E+006  
 NativeLESA\_method\_glassslide\_undosed\_brain\_5pMeOH\_P7\_run19.RAW

**Supplemental Figure 1 ctd.** Comparison of deconvoluted native LESA mass spectra from **C)** two separate cerebellum locations one sampled with 10 mM ammonium acetate, 5% MeOH and one with 10 mM ammonium acetate, 0.125% C8E4 **D)** one cerebellum location and one cerebral cortex location sampled with 10 mM ammonium acetate, 0.125% C8E4 .

**E)**

NativeLESA\_undosed\_rat\_kidney\_run3.RAW ReSpect™ (Isotopically Unresolved) NL: 1.27E+007  
 NativeLESA\_undosed\_rat\_kidney\_run3.RAW

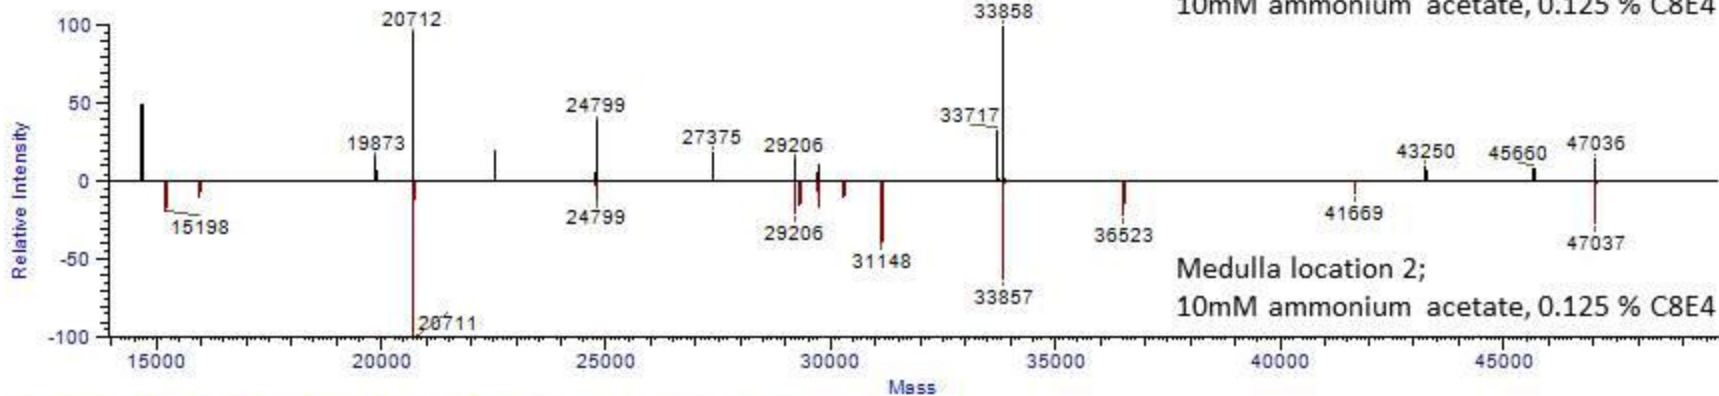

NativeLESA\_undosed\_rat\_kidney\_run9.RAW ReSpect™ (Isotopically Unresolved) NL: 1.98E+007  
 NativeLESA\_undosed\_rat\_kidney\_run9.RAW

**F)**

NativeLESA\_undosed\_rat\_kidney\_run9.RAW ReSpect™ (Isotopically Unresolved) NL: 1.98E+007  
 NativeLESA\_undosed\_rat\_kidney\_run9.RAW

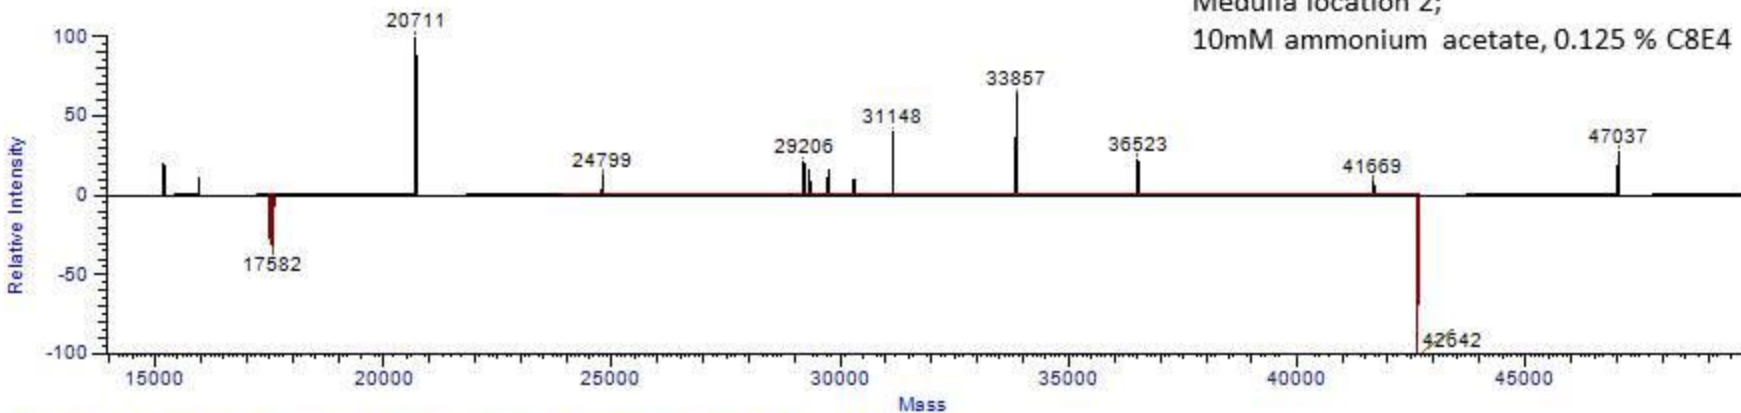

NativeLESA\_undosed\_rat\_kidney\_run5.RAW ReSpect™ (Isotopically Unresolved) NL: 2.95E+007  
 NativeLESA\_undosed\_rat\_kidney\_run5.RAW

Cortex location 1;  
10mM ammonium acetate, 0.125 % C8E4

**Supplemental Figure 1 ctd.** Comparison of deconvoluted native LESA mass spectra from **E)** two separate medulla (kidney) locations one sampled with 10 mM ammonium acetate, 0.125% C8E4 and **F)** one medulla (kidney) location and one cortex (kidney) location sampled with 10 mM ammonium acetate, 0.125% C8E4 .

### A) Cerebral Cortex sampled without detergent

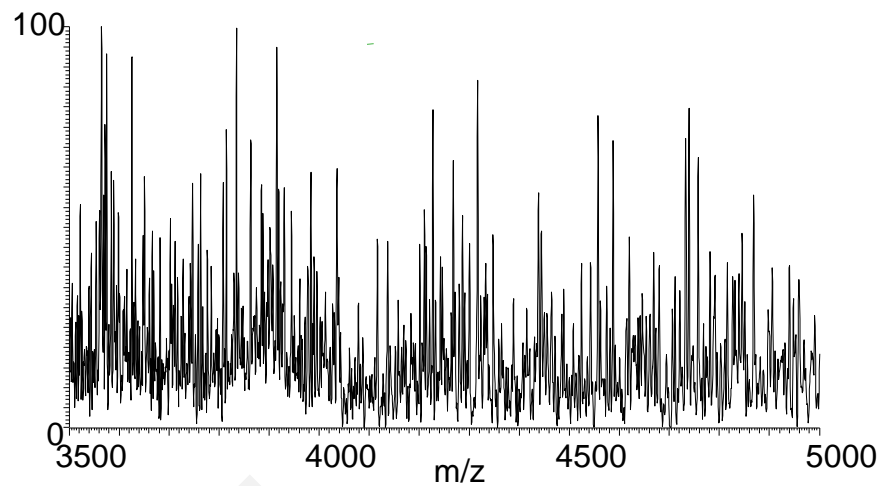

### B) Cerebral Cortex sampled with detergent

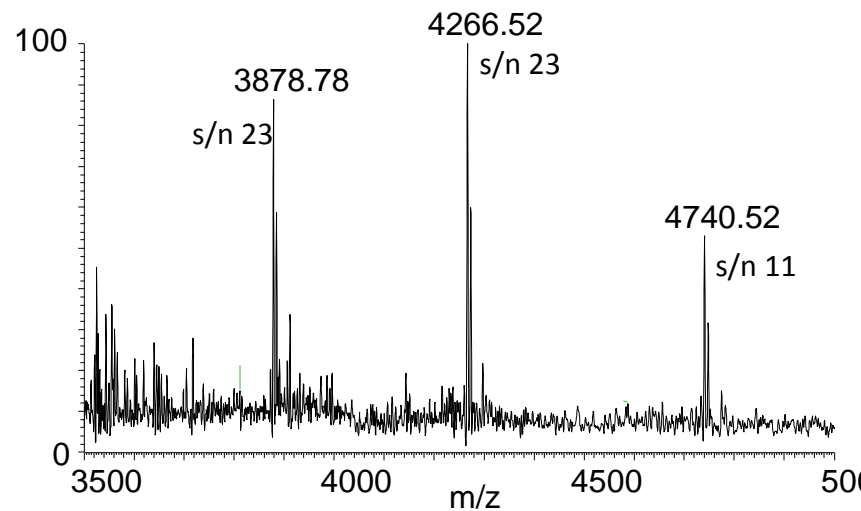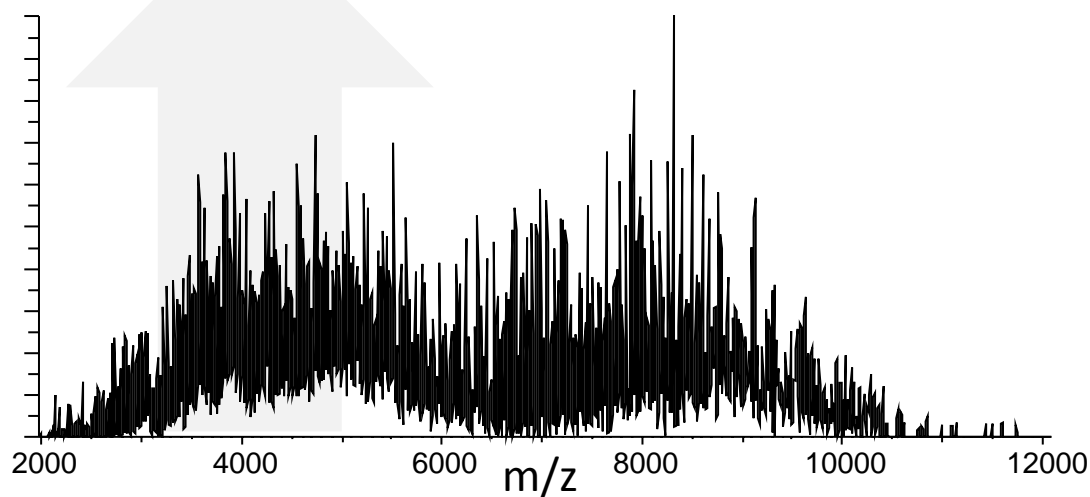

**Supplemental Figure 2.** Native LESA MS of rat brain tissue. A) Sampling location: cerebral cortex. LESA extraction/ionisation solvent: 10 mM ammonium acetate, 5% MeOH. B) Detail from main figure 1C. Sampling location cerebral cortex. LESA extraction/ionisation solvent: 10 mM ammonium acetate, 0.125% C8E4.

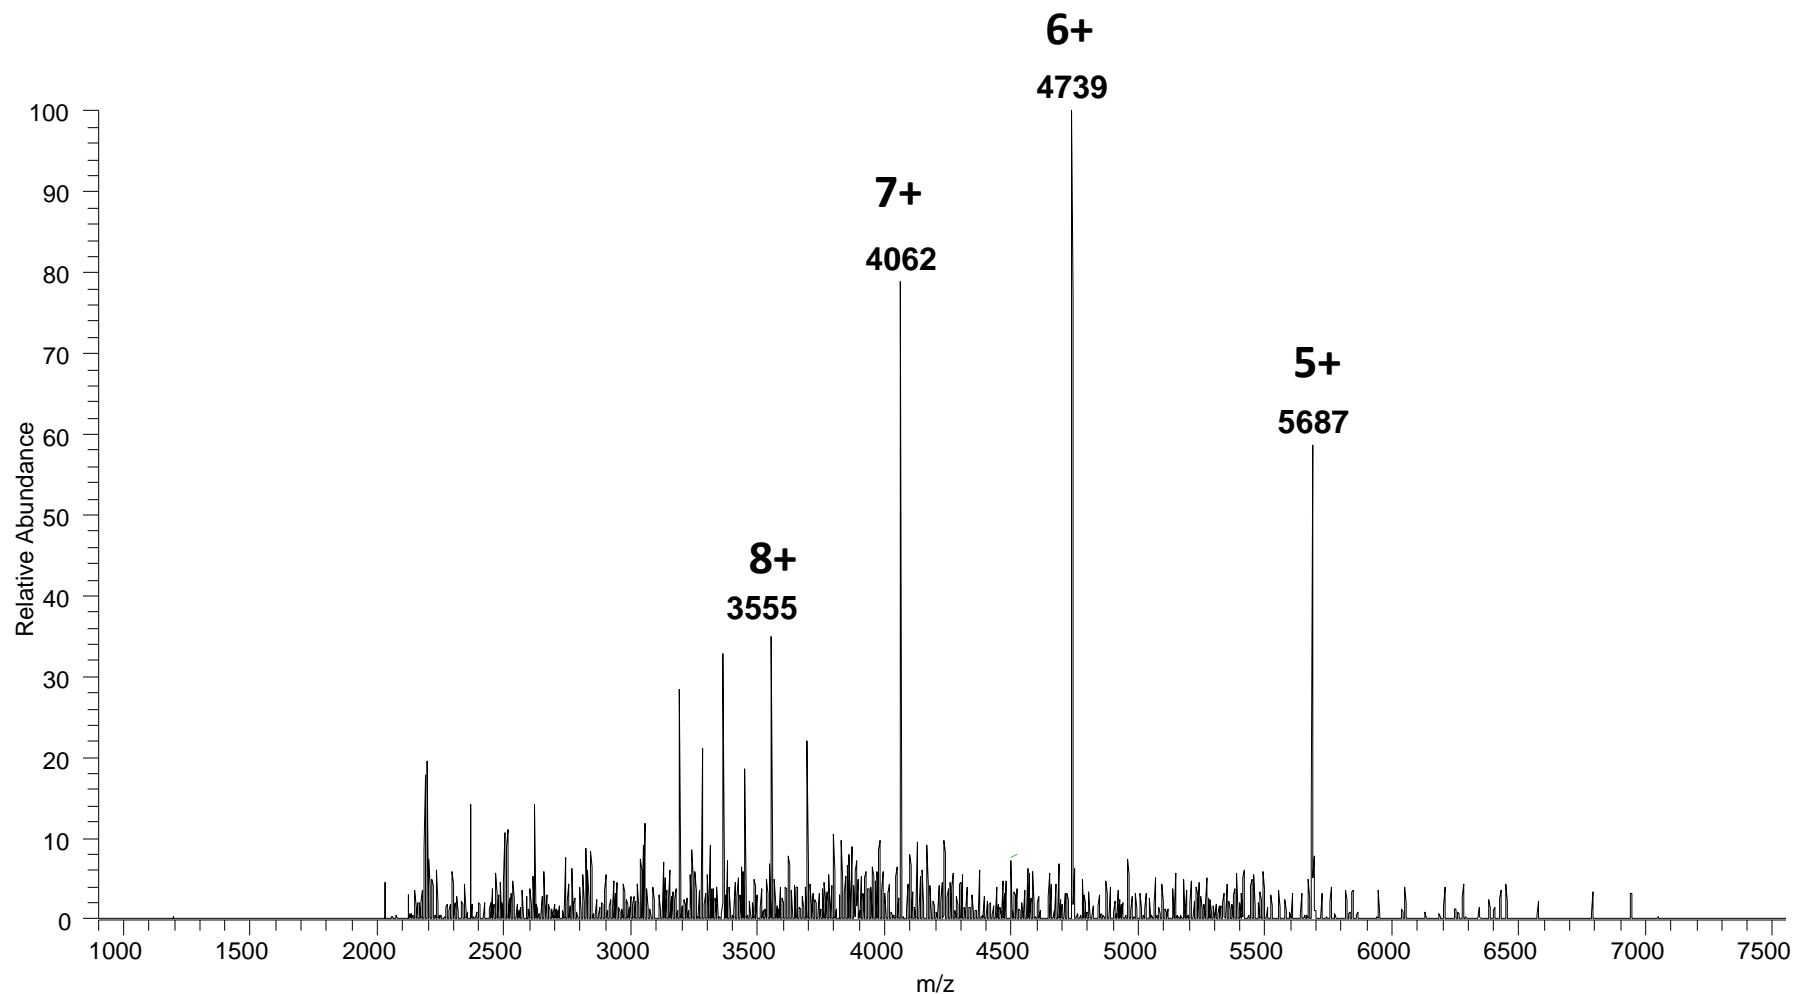

**Supplemental Figure 3.** Native LESA MS of rat kidney tissue. Sampling location: outer cortex. LESA extraction/ionisation solvent: 10 mM ammonium acetate, 5% MeOH.

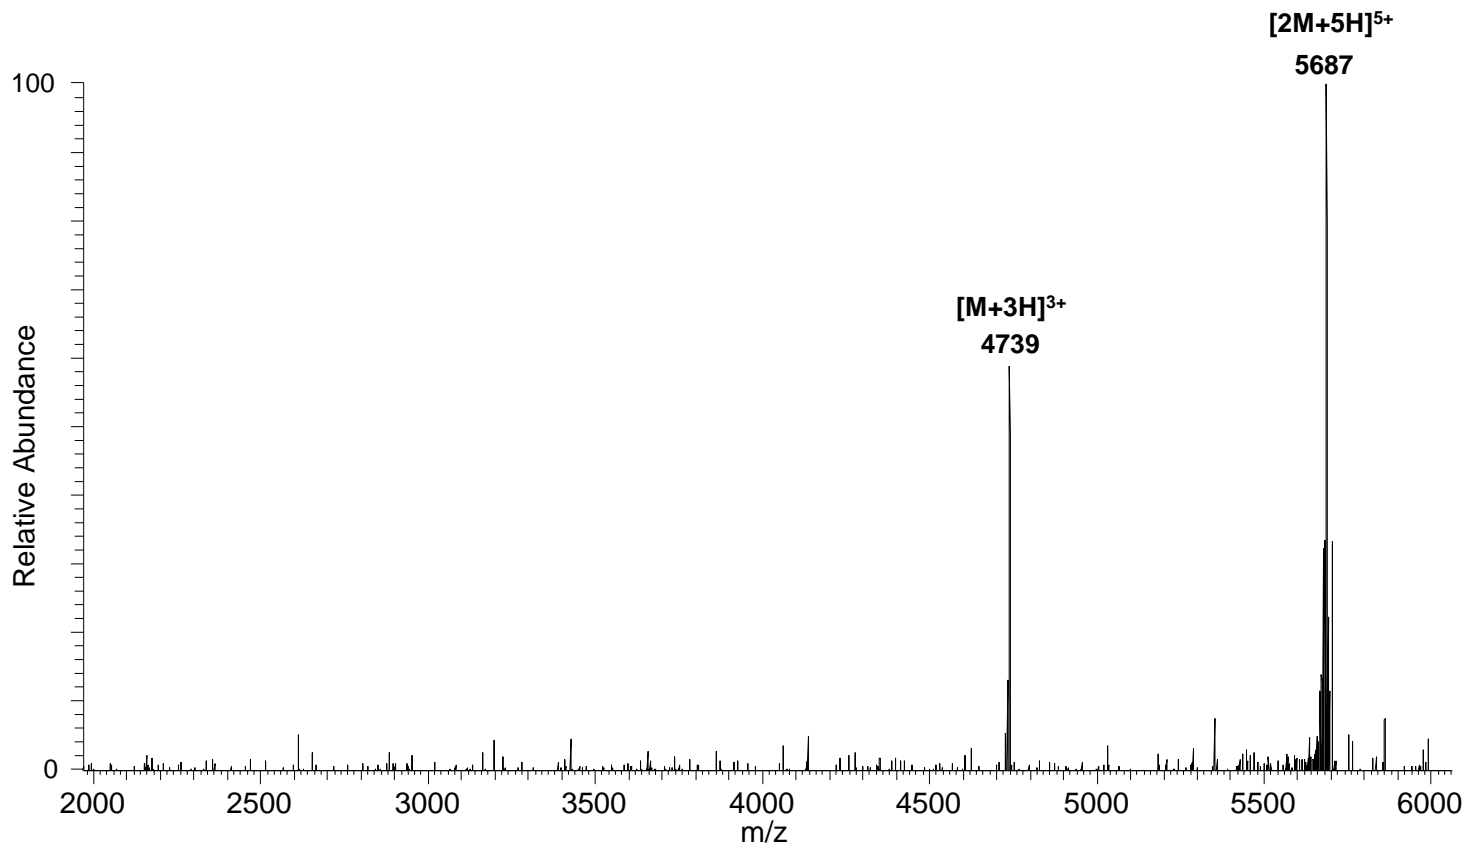

**Supplemental Figure 4.** Native LESA HCD MS/MS of rat kidney tissue. Sampling location: outer cortex. LESA extraction/ionisation solvent: 10 mM ammonium acetate, 5% MeOH. HCD energy = 80%.



**Supplemental File 1:** Biopharma Finder search parameters and outputs for LESA mass spectrum shown in Fig 1A. (Cerebellum, 10 mM ammonium acetate, 5% MeOH).

# BioPharma Finder Report

Created: 08/04/2019 09:56:45

## Sample Information

|                       |                                                                                        |
|-----------------------|----------------------------------------------------------------------------------------|
| Raw File Name         | C:\Xcalibur\Data\ms2LESA\NativeLESA_method_glassslide_undosed_brain_5pMeOH_P4_run2.RAW |
| Instrument Method     |                                                                                        |
| Vial                  |                                                                                        |
| Injection Volume (µL) | 0                                                                                      |
| Sample Weight         | 0                                                                                      |
| Sample Volume (µL)    | 0                                                                                      |
| ISTD Amount           | 0                                                                                      |
| Dil Factor            | 0                                                                                      |

## Chromatogram Parameters

|                              |                       |
|------------------------------|-----------------------|
| Use Restricted Time          | False                 |
| Time Limits                  | 0.023 - 7.169 minutes |
| Scan Range                   | 1 - 334               |
| m/z Range                    | 400 - 20000           |
| Chromatogram Trace Type      | TIC                   |
| Sensitivity                  | High                  |
| Rel. Intensity Threshold (%) | 1                     |

## Chromatogram

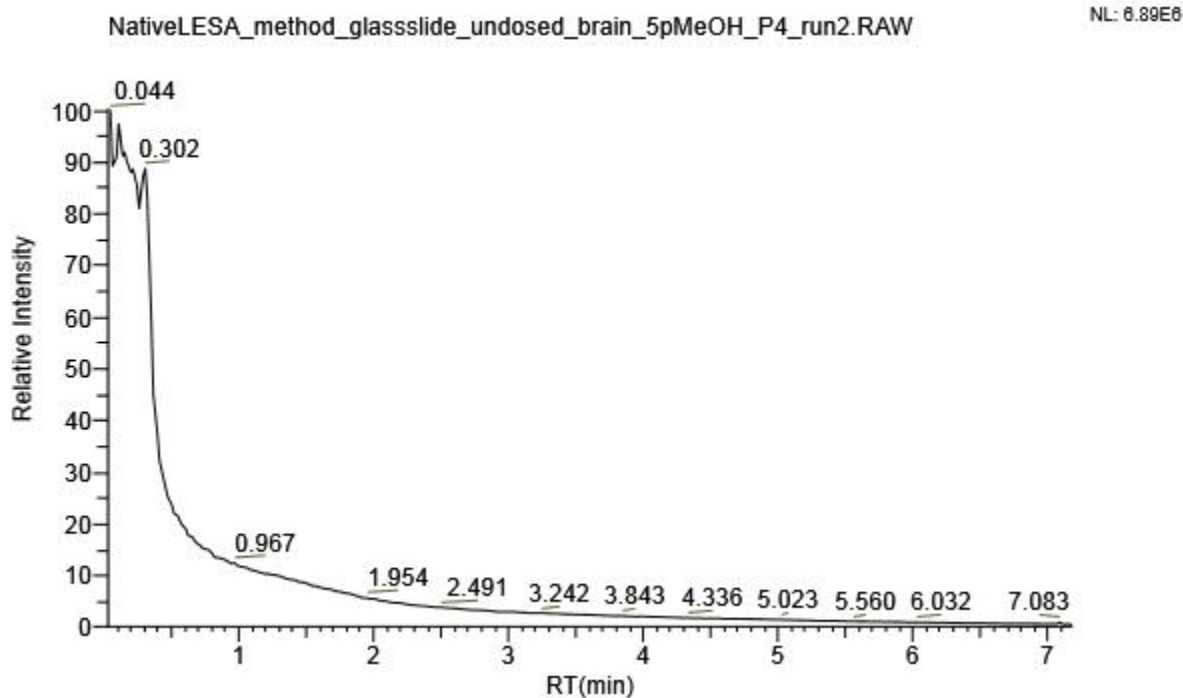

| Main Parameters ( ReSpect™ )                        |                        |
|-----------------------------------------------------|------------------------|
| Deconvolution Results Filter                        |                        |
| Output Mass Range                                   | 5000 - 100000          |
| Deconvoluted Spectra Display Mode                   | Isotopic Profile (new) |
| Charge State Distribution                           |                        |
| Deconvolution Mass Tolerance                        | 30 ppm                 |
| Choice of Peak Model                                |                        |
| Choice of Peak Model                                | Intact Protein         |
| Resolution at 400 m/z                               |                        |
| Raw File Specific                                   | 6187                   |
| Generate XIC for Each Component                     |                        |
| Calculate XIC                                       | False                  |
| Advanced Parameters ( ReSpect™ )                    |                        |
| Charge State Distribution                           |                        |
| Model Mass Range                                    | 10000 - 120000         |
| Charge State Range                                  | 5 - 40                 |
| Minimum Adjacent Charges<br>(low & high model mass) | 3 - 3                  |
| Noise Parameters                                    |                        |
| Rel. Abundance Threshold (%)                        | 15                     |
| Deconvolution Quality                               |                        |
| Quality Score Threshold                             | 0                      |
| Choice of Peak Model                                |                        |
| Target Mass                                         | 120000 Da              |
| Peak Model Parameters                               |                        |
| Number of Peak Models                               | 1                      |
| Left/Right Peak Shape                               | 2:2                    |
| Peak Filter Parameters                              |                        |
| Peak Detection Minimum Significance Measure         | 1 Standard Deviations  |
| Peak Detection Quality Measure                      | 95%                    |
| Specialized Parameters                              |                        |
| Peak Model Width Factor                             | 1                      |
| Intensity Threshold Scale                           | 0.01                   |
| Deconvolution Parameters                            |                        |
| Noise Compensation                                  | True                   |
| Charge Carrier                                      | H                      |
| Negative Charge                                     | False                  |
| Source Spectra Parameters                           |                        |
| Source Spectra Method                               | Sliding Windows        |
| Sliding Windows Definition                          |                        |
| RT Range                                            | 0.500 - 3.000 minutes  |
| Target Avg Spectrum Width                           | 0.2 minutes            |
| Target Avg Spectrum Offset Scan                     | 1                      |
| Sliding Windows Merging Parameters                  |                        |
| Merge Tolerance                                     | 30 ppm                 |
| Max RT Gap                                          | 0.5 minutes            |
| Min. Number of Detected Intervals                   | 40                     |

NativeLESA\_method\_glassslide\_undosed\_brain\_5pMeOH\_P4\_run2

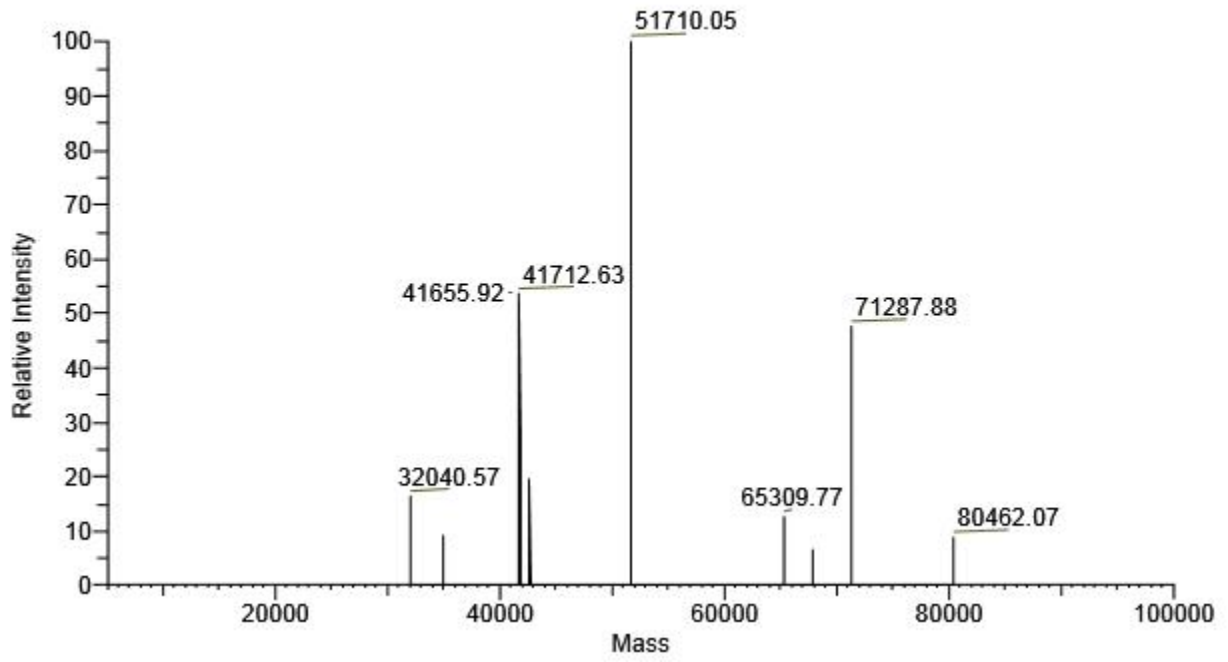

Sliding Windows ReSpect Masses Table

| Row Number | Average Mass | Sum Intensity          | Relative Abundance | Fractional Abundance | Score | Number of Charge States | Charge State Distribution | Number of Detected Intervals | Mass Std Dev | PPM Std Dev | Delta Mass | Scan Range | Start Time (min) | Stop Time (min) | Apex RT |
|------------|--------------|------------------------|--------------------|----------------------|-------|-------------------------|---------------------------|------------------------------|--------------|-------------|------------|------------|------------------|-----------------|---------|
| 1          | 51710.05     | 7604135.0 <sub>9</sub> | 100.00             | 28.79                | 23.63 | 5                       | 13 - 17                   | 67                           | 4.50         | 87.11       | 0.00       | 23 - 138   | 0.495            | 2.984           | 0.849   |
| 2          | 41712.63     | 4073971.5 <sub>2</sub> | 53.58              | 15.43                | 21.32 | 4                       | 12 - 15                   | 102                          | 2.57         | 61.59       | -9997.42   | 24 - 135   | 0.516            | 2.920           | 1.171   |
| 3          | 71287.88     | 3610938.8 <sub>0</sub> | 47.49              | 13.67                | 19.10 | 3                       | 16 - 18                   | 108                          | 4.65         | 65.20       | 19577.84   | 23 - 138   | 0.495            | 2.984           | 0.999   |
| 4          | 41655.92     | 2885603.6 <sub>8</sub> | 37.95              | 10.93                | 22.57 | 5                       | 11 - 15                   | 106                          | 2.15         | 51.62       | -10054.13  | 25 - 138   | 0.538            | 2.984           | 0.892   |
| 5          | 41779.80     | 1954143.2 <sub>9</sub> | 25.70              | 7.40                 | 24.03 | 5                       | 11 - 15                   | 88                           | 2.96         | 70.86       | -9930.25   | 37 - 136   | 0.795            | 2.941           | 1.343   |
| 6          | 42589.13     | 1479714.7 <sub>8</sub> | 19.46              | 5.60                 | 20.84 | 5                       | 10 - 14                   | 78                           | 3.38         | 79.36       | -9120.91   | 26 - 138   | 0.559            | 2.984           | 1.450   |
| 7          | 32040.57     | 1239853.2 <sub>3</sub> | 16.30              | 4.69                 | 16.68 | 3                       | 8 - 10                    | 51                           | 2.15         | 67.16       | -19669.48  | 37 - 100   | 0.795            | 2.169           | 1.600   |
| 8          | 65309.77     | 950060.43              | 12.49              | 3.60                 | 21.82 | 4                       | 17 - 20                   | 58                           | 5.48         | 83.87       | 13599.72   | 72 - 138   | 1.546            | 2.984           | 1.943   |
| 9          | 42656.79     | 761224.11              | 10.01              | 2.88                 | 17.86 | 3                       | 11 - 13                   | 49                           | 3.45         | 80.79       | -9053.26   | 23 - 138   | 0.495            | 2.984           | 0.591   |
| 10         | 34900.39     | 690711.47              | 9.08               | 2.62                 | 18.11 | 3                       | 8 - 10                    | 50                           | 2.43         | 69.71       | -16809.65  | 74 - 134   | 1.589            | 2.899           | 1.836   |
| 11         | 80462.07     | 669635.99              | 8.81               | 2.54                 | 18.69 | 3                       | 23 - 25                   | 58                           | 2.64         | 32.84       | 28752.02   | 58 - 131   | 1.246            | 2.834           | 2.094   |
| 12         | 67902.81     | 491095.13              | 6.46               | 1.86                 | 15.81 | 3                       | 21 - 23                   | 41                           | 3.69         | 54.36       | 16192.76   | 56 - 125   | 1.203            | 2.705           | 2.029   |

**Supplemental File 2:** Biopharma Finder search parameters and outputs for LESA mass spectrum obtained from separate cerebellum location (Cerebellum, 10 mM ammonium acetate, 5% MeOH).

# BioPharma Finder Report

Created: 08/04/2019 10:20:13

## Sample Information

|                       |                                                                                         |
|-----------------------|-----------------------------------------------------------------------------------------|
| Raw File Name         | C:\Xcalibur\Data\ms2LESA\NativeLESA_method_glassslide_undosed_brain_5pMeOH_P7_run20.RAW |
| Instrument Method     |                                                                                         |
| Vial                  |                                                                                         |
| Injection Volume (µL) | 0                                                                                       |
| Sample Weight         | 0                                                                                       |
| Sample Volume (µL)    | 0                                                                                       |
| ISTD Amount           | 0                                                                                       |
| Dil Factor            | 0                                                                                       |

## Chromatogram Parameters

|                              |                       |
|------------------------------|-----------------------|
| Use Restricted Time          | False                 |
| Time Limits                  | 0.023 - 7.169 minutes |
| Scan Range                   | 1 - 334               |
| m/z Range                    | 400 - 20000           |
| Chromatogram Trace Type      | TIC                   |
| Sensitivity                  | High                  |
| Rel. Intensity Threshold (%) | 1                     |

## Chromatogram

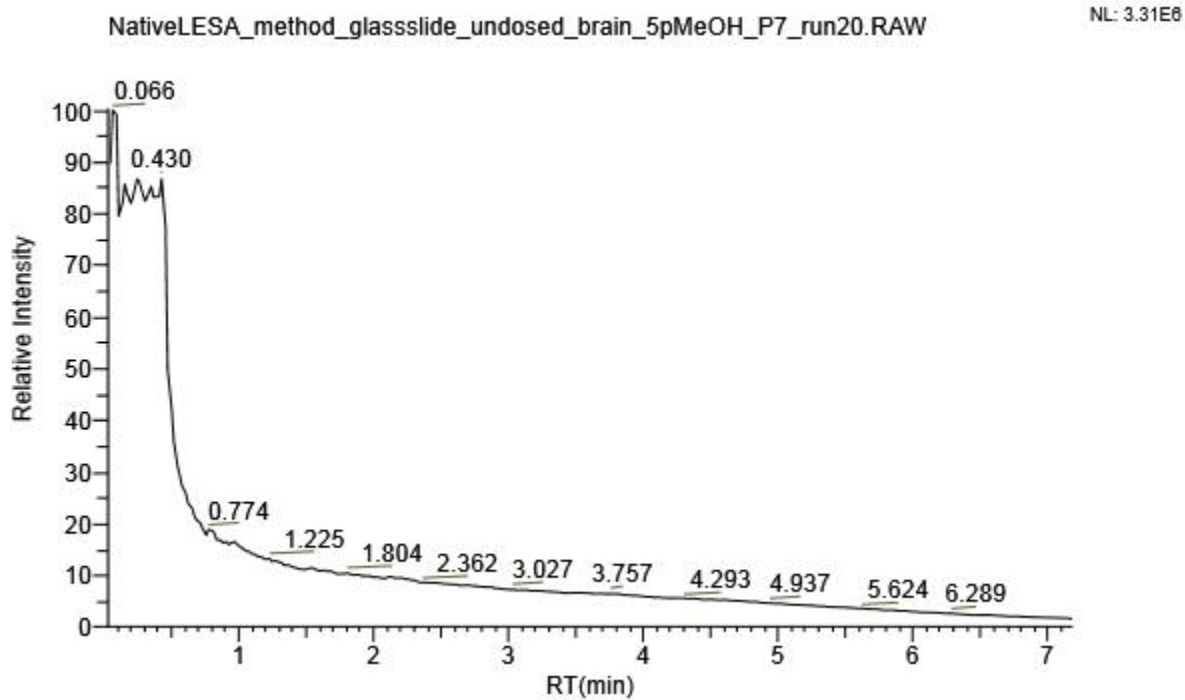

## Main Parameters ( ReSpect™ )

|                                   |                        |
|-----------------------------------|------------------------|
| Deconvolution Results Filter      |                        |
| Output Mass Range                 | 5000 - 100000          |
| Deconvoluted Spectra Display Mode | Isotopic Profile (new) |
| Charge State Distribution         |                        |
| Deconvolution Mass Tolerance      | 30 ppm                 |
| Choice of Peak Model              |                        |
| Choice of Peak Model              | Intact Protein         |
| Resolution at 400 m/z             |                        |
| Raw File Specific                 | 6187                   |
| Generate XIC for Each Component   |                        |
| Calculate XIC                     | False                  |

## Advanced Parameters ( ReSpect™ )

|                                                     |                       |
|-----------------------------------------------------|-----------------------|
| Charge State Distribution                           |                       |
| Model Mass Range                                    | 10000 - 120000        |
| Charge State Range                                  | 5 - 40                |
| Minimum Adjacent Charges<br>(low & high model mass) | 3 - 3                 |
| Noise Parameters                                    |                       |
| Rel. Abundance Threshold (%)                        | 15                    |
| Deconvolution Quality                               |                       |
| Quality Score Threshold                             | 0                     |
| Choice of Peak Model                                |                       |
| Target Mass                                         | 120000 Da             |
| Peak Model Parameters                               |                       |
| Number of Peak Models                               | 1                     |
| Left/Right Peak Shape                               | 2:2                   |
| Peak Filter Parameters                              |                       |
| Peak Detection Minimum Significance Measure         | 1 Standard Deviations |
| Peak Detection Quality Measure                      | 95%                   |
| Specialized Parameters                              |                       |
| Peak Model Width Factor                             | 1                     |
| Intensity Threshold Scale                           | 0.01                  |
| Deconvolution Parameters                            |                       |
| Noise Compensation                                  | True                  |
| Charge Carrier                                      | H                     |
| Negative Charge                                     | False                 |

## Source Spectra Parameters

|                                    |                       |
|------------------------------------|-----------------------|
| Source Spectra Method              | Sliding Windows       |
| Sliding Windows Definition         |                       |
| RT Range                           | 2.000 - 9.000 minutes |
| Target Avg Spectrum Width          | 0.2 minutes           |
| Target Avg Spectrum Offset Scan    | 1                     |
| Sliding Windows Merging Parameters |                       |
| Merge Tolerance                    | 30 ppm                |
| Max RT Gap                         | 0.5 minutes           |
| Min. Number of Detected Intervals  | 100                   |



NativeLESA\_method\_glassslide\_undosed\_brain\_5pMeOH\_P7\_run20

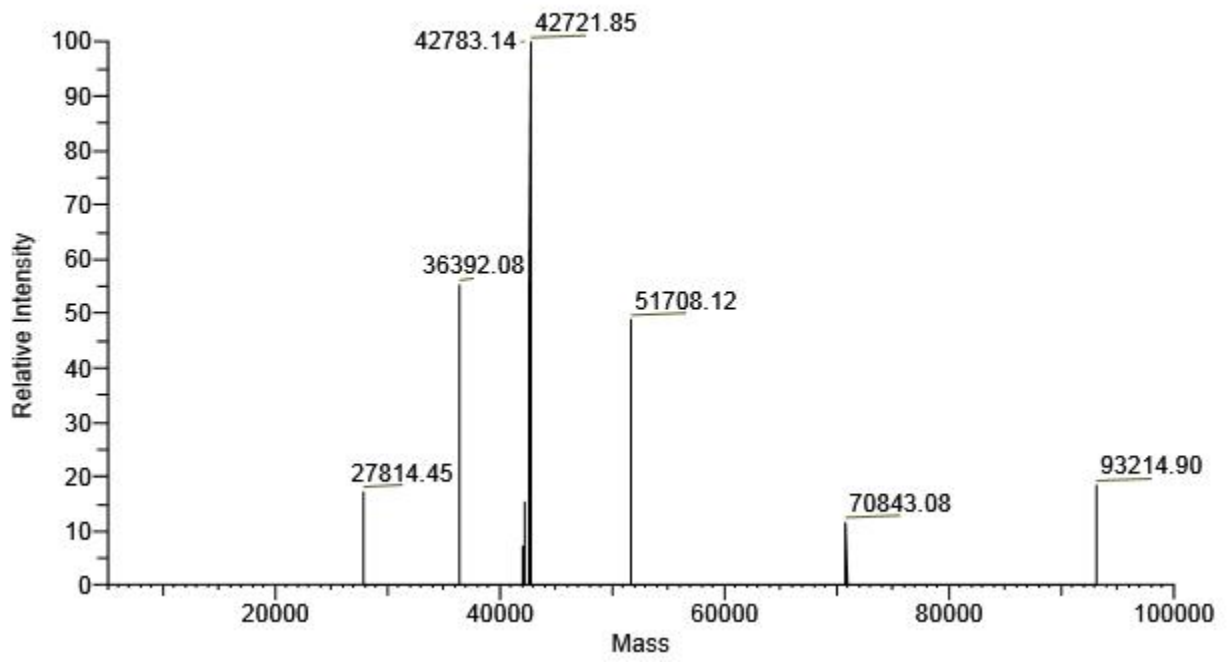

Sliding Windows ReSpect Masses Table

| Row Number | Average Mass | Sum Intensity  | Relative Abundance | Fractional Abundance | Score | Number of Charge States | Charge State Distribution | Number of Detected Intervals | Mass Std Dev | PPM Std Dev | Delta Mass | Scan Range | Start Time (min) | Stop Time (min) | Apex RT |
|------------|--------------|----------------|--------------------|----------------------|-------|-------------------------|---------------------------|------------------------------|--------------|-------------|------------|------------|------------------|-----------------|---------|
| 1          | 42721.85     | 7320974.1<br>9 | 100.00             | 27.11                | 19.39 | 4                       | 11 - 14                   | 275                          | 2.90         | 67.78       | 0.00       | 93 - 417   | 1.997            | 8.972           | 2.308   |
| 2          | 36392.08     | 4033161.7<br>6 | 55.09              | 14.93                | 26.19 | 6                       | 7 - 12                    | 287                          | 2.70         | 74.18       | -6329.77   | 93 - 416   | 1.997            | 8.951           | 2.995   |
| 3          | 42653.26     | 3874901.3<br>3 | 52.93              | 14.35                | 22.10 | 4                       | 11 - 14                   | 195                          | 3.18         | 74.51       | -68.59     | 93 - 345   | 1.997            | 7.427           | 2.802   |
| 4          | 51708.12     | 3572900.9<br>8 | 48.80              | 13.23                | 18.93 | 4                       | 13 - 16                   | 281                          | 2.82         | 54.58       | 8986.27    | 129 - 417  | 2.770            | 8.972           | 3.038   |
| 5          | 42783.14     | 3141993.2<br>1 | 42.92              | 11.63                | 17.54 | 4                       | 10 - 13                   | 253                          | 3.41         | 79.81       | 61.29      | 93 - 356   | 1.997            | 7.663           | 2.459   |
| 6          | 93214.90     | 1344648.8<br>9 | 18.37              | 4.98                 | 27.12 | 6                       | 24 - 29                   | 128                          | 7.84         | 84.10       | 50493.05   | 116 - 282  | 2.491            | 6.075           | 3.596   |
| 7          | 27814.45     | 1249522.3<br>5 | 17.07              | 4.63                 | 18.36 | 3                       | 8 - 10                    | 195                          | 0.97         | 34.93       | -14907.40  | 124 - 328  | 2.662            | 7.062           | 3.360   |
| 8          | 42206.97     | 1115973.1<br>0 | 15.24              | 4.13                 | 18.89 | 4                       | 10 - 13                   | 114                          | 3.16         | 74.94       | -514.88    | 131 - 255  | 2.813            | 5.495           | 3.746   |
| 9          | 70843.08     | 832450.64      | 11.37              | 3.08                 | 19.79 | 4                       | 17 - 20                   | 110                          | 6.70         | 94.63       | 28121.23   | 194 - 377  | 4.165            | 8.114           | 4.862   |
| 10         | 41966.52     | 519591.40      | 7.10               | 1.92                 | 17.76 | 3                       | 11 - 13                   | 116                          | 2.18         | 52.04       | -755.33    | 164 - 297  | 3.521            | 6.397           | 3.789   |

**Supplemental File 3:** Biopharma Finder search parameters and outputs for LESA mass spectrum shown in Fig 1B. (Cerebellum, 10 mM ammonium acetate, 0.125% C8E4).

# BioPharma Finder Report

Created: 08/04/2019 11:20:38

## Sample Information

|                       |                                                                                         |
|-----------------------|-----------------------------------------------------------------------------------------|
| Raw File Name         | C:\Xcalibur\Data\ms2LESA\NativeLESA_method_glassslide_undosed_brain_5pMeOH_P7_run19.RAW |
| Instrument Method     |                                                                                         |
| Vial                  |                                                                                         |
| Injection Volume (µL) | 0                                                                                       |
| Sample Weight         | 0                                                                                       |
| Sample Volume (µL)    | 0                                                                                       |
| ISTD Amount           | 0                                                                                       |
| Dil Factor            | 0                                                                                       |

## Chromatogram Parameters

|                              |                       |
|------------------------------|-----------------------|
| Use Restricted Time          | False                 |
| Time Limits                  | 0.023 - 7.169 minutes |
| Scan Range                   | 1 - 334               |
| m/z Range                    | 400 - 20000           |
| Chromatogram Trace Type      | TIC                   |
| Sensitivity                  | High                  |
| Rel. Intensity Threshold (%) | 1                     |

## Chromatogram

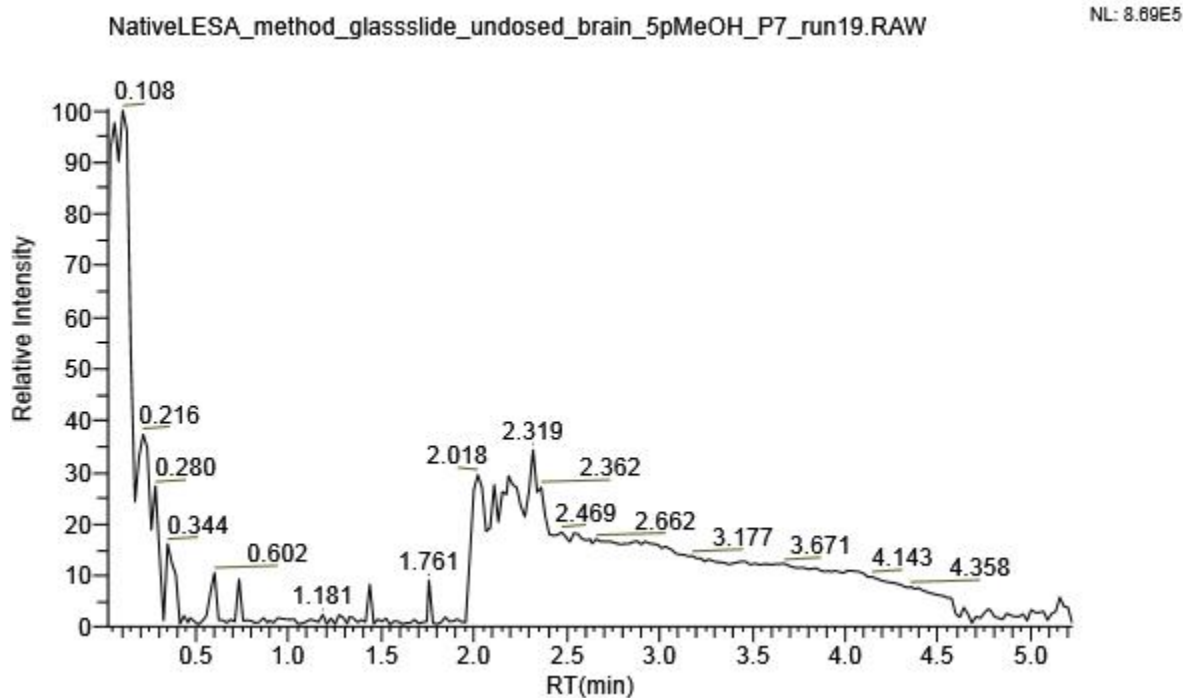

| Main Parameters ( ReSpect™ )                        |                        |
|-----------------------------------------------------|------------------------|
| Deconvolution Results Filter                        |                        |
| Output Mass Range                                   | 5000 - 100000          |
| Deconvoluted Spectra Display Mode                   | Isotopic Profile (new) |
| Charge State Distribution                           |                        |
| Deconvolution Mass Tolerance                        | 30 ppm                 |
| Choice of Peak Model                                |                        |
| Choice of Peak Model                                | Intact Protein         |
| Resolution at 400 m/z                               |                        |
| Raw File Specific                                   | 6187                   |
| Generate XIC for Each Component                     |                        |
| Calculate XIC                                       | False                  |
| Advanced Parameters ( ReSpect™ )                    |                        |
| Charge State Distribution                           |                        |
| Model Mass Range                                    | 10000 - 120000         |
| Charge State Range                                  | 5 - 40                 |
| Minimum Adjacent Charges<br>(low & high model mass) | 3 - 3                  |
| Noise Parameters                                    |                        |
| Rel. Abundance Threshold (%)                        | 15                     |
| Deconvolution Quality                               |                        |
| Quality Score Threshold                             | 0                      |
| Choice of Peak Model                                |                        |
| Target Mass                                         | 120000 Da              |
| Peak Model Parameters                               |                        |
| Number of Peak Models                               | 1                      |
| Left/Right Peak Shape                               | 2:2                    |
| Peak Filter Parameters                              |                        |
| Peak Detection Minimum Significance Measure         | 1 Standard Deviations  |
| Peak Detection Quality Measure                      | 95%                    |
| Specialized Parameters                              |                        |
| Peak Model Width Factor                             | 1                      |
| Intensity Threshold Scale                           | 0.01                   |
| Deconvolution Parameters                            |                        |
| Noise Compensation                                  | True                   |
| Charge Carrier                                      | H                      |
| Negative Charge                                     | False                  |
| Source Spectra Parameters                           |                        |
| Source Spectra Method                               | Sliding Windows        |
| Sliding Windows Definition                          |                        |
| RT Range                                            | 2.000 - 4.500 minutes  |
| Target Avg Spectrum Width                           | 0.2 minutes            |
| Target Avg Spectrum Offset Scan                     | 1                      |
| Sliding Windows Merging Parameters                  |                        |
| Merge Tolerance                                     | 30 ppm                 |
| Max RT Gap                                          | 0.5 minutes            |
| Min. Number of Detected Intervals                   | 40                     |

NativeLESA\_method\_glassslide\_undosed\_brain\_5pMeOH\_P7\_run19

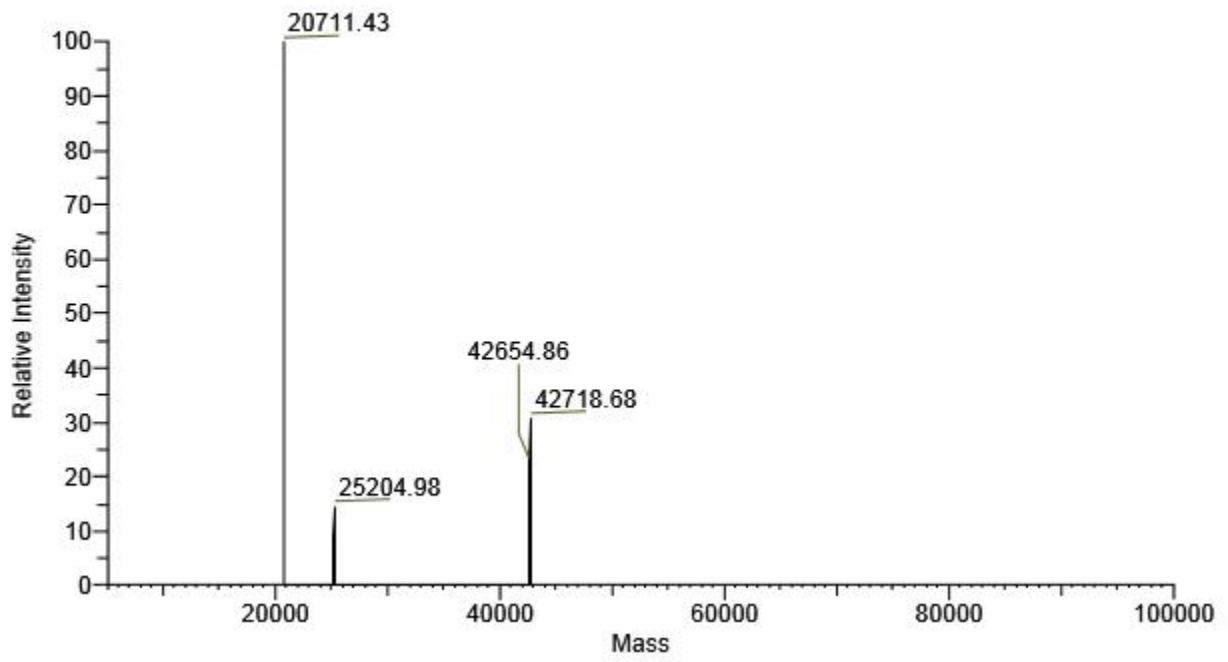

Sliding Windows ReSpect Masses Table

| Row Number | Average Mass | Sum Intensity  | Relative Abundance | Fractional Abundance | Score | Number of Charge States | Charge State Distribution | Number of Detected Intervals | Mass Std Dev | PPM Std Dev | Delta Mass | Scan Range | Start Time (min) | Stop Time (min) | Apex RT |
|------------|--------------|----------------|--------------------|----------------------|-------|-------------------------|---------------------------|------------------------------|--------------|-------------|------------|------------|------------------|-----------------|---------|
| 1          | 20711.43     | 7111245.1<br>6 | 100.00             | 55.09                | 23.47 | 4                       | 5 - 8                     | 108                          | 0.48         | 23.24       | 0.00       | 93 - 208   | 1.997            | 4.486           | 2.780   |
| 2          | 42718.68     | 2174219.2<br>9 | 30.57              | 16.84                | 17.62 | 4                       | 9 - 12                    | 90                           | 2.27         | 53.17       | 22007.25   | 96 - 194   | 2.061            | 4.186           | 2.630   |
| 3          | 42654.86     | 1593266.1<br>7 | 22.40              | 12.34                | 16.77 | 3                       | 9 - 11                    | 91                           | 2.43         | 57.01       | 21943.43   | 110 - 208  | 2.362            | 4.486           | 2.716   |
| 4          | 25204.98     | 1016270.9<br>2 | 14.29              | 7.87                 | 17.29 | 3                       | 6 - 8                     | 62                           | 1.73         | 68.49       | 4493.56    | 108 - 189  | 2.319            | 4.079           | 2.587   |
| 5          | 42782.08     | 1013706.9<br>7 | 14.25              | 7.85                 | 18.77 | 4                       | 9 - 12                    | 40                           | 2.91         | 68.07       | 22070.66   | 93 - 173   | 1.997            | 3.735           | 2.609   |

**Supplemental File 4:** Biopharma Finder search parameters and outputs for LESA mass spectrum shown in Fig 1C. (Cerebral cortex, 10 mM ammonium acetate, 0.125% C8E4).



# BioPharma Finder Report

Created: 08/04/2019 12:25:49

## Sample Information

|                       |                                                                                     |
|-----------------------|-------------------------------------------------------------------------------------|
| Raw File Name         | C:\Xcalibur\Data\ms2LESA\NativeLESA_method_glassslide__rat_brain_5pMeOH_P4_run8.RAW |
| Instrument Method     |                                                                                     |
| Vial                  |                                                                                     |
| Injection Volume (µL) | 0                                                                                   |
| Sample Weight         | 0                                                                                   |
| Sample Volume (µL)    | 0                                                                                   |
| ISTD Amount           | 0                                                                                   |
| Dil Factor            | 0                                                                                   |

## Chromatogram Parameters

|                              |                       |
|------------------------------|-----------------------|
| Use Restricted Time          | False                 |
| Time Limits                  | 0.023 - 7.169 minutes |
| Scan Range                   | 1 - 334               |
| m/z Range                    | 400 - 20000           |
| Chromatogram Trace Type      | TIC                   |
| Sensitivity                  | High                  |
| Rel. Intensity Threshold (%) | 1                     |

## Chromatogram

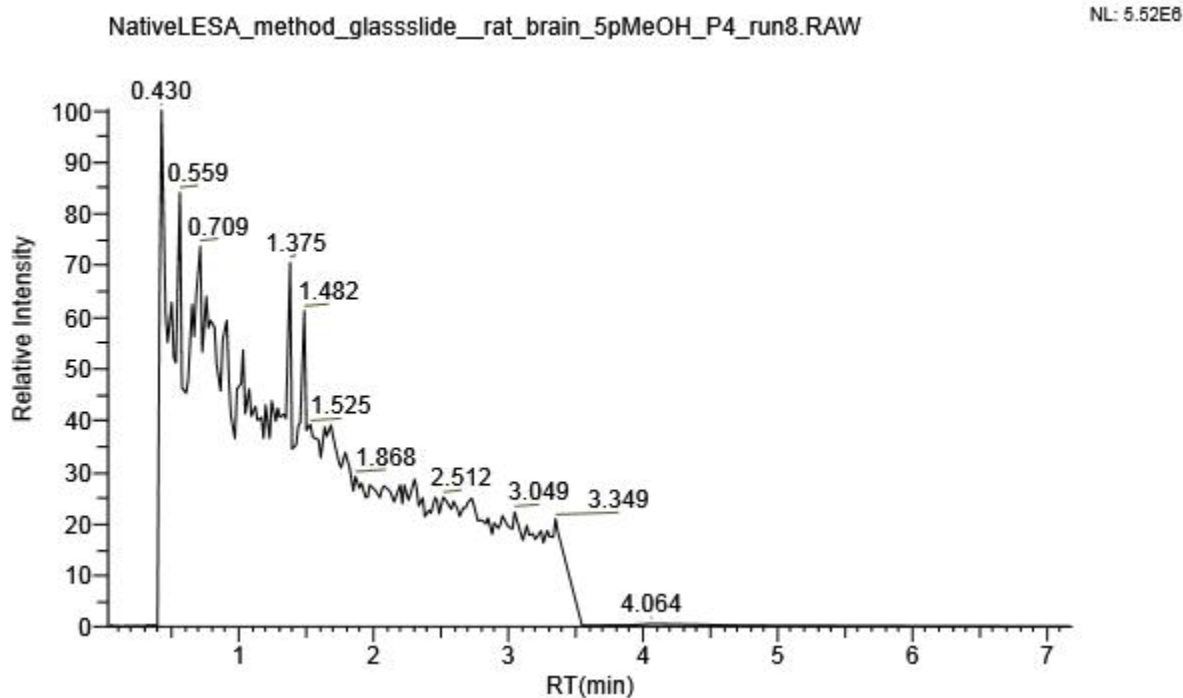

| Main Parameters ( ReSpect™ )                        |                        |
|-----------------------------------------------------|------------------------|
| Deconvolution Results Filter                        |                        |
| Output Mass Range                                   | 5000 - 100000          |
| Deconvoluted Spectra Display Mode                   | Isotopic Profile (new) |
| Charge State Distribution                           |                        |
| Deconvolution Mass Tolerance                        | 30 ppm                 |
| Choice of Peak Model                                |                        |
| Choice of Peak Model                                | Intact Protein         |
| Resolution at 400 m/z                               |                        |
| Raw File Specific                                   | 6187                   |
| Generate XIC for Each Component                     |                        |
| Calculate XIC                                       | False                  |
| Advanced Parameters ( ReSpect™ )                    |                        |
| Charge State Distribution                           |                        |
| Model Mass Range                                    | 10000 - 120000         |
| Charge State Range                                  | 5 - 40                 |
| Minimum Adjacent Charges<br>(low & high model mass) | 3 - 3                  |
| Noise Parameters                                    |                        |
| Rel. Abundance Threshold (%)                        | 15                     |
| Deconvolution Quality                               |                        |
| Quality Score Threshold                             | 0                      |
| Choice of Peak Model                                |                        |
| Target Mass                                         | 120000 Da              |
| Peak Model Parameters                               |                        |
| Number of Peak Models                               | 1                      |
| Left/Right Peak Shape                               | 2:2                    |
| Peak Filter Parameters                              |                        |
| Peak Detection Minimum Significance Measure         | 1 Standard Deviations  |
| Peak Detection Quality Measure                      | 95%                    |
| Specialized Parameters                              |                        |
| Peak Model Width Factor                             | 1                      |
| Intensity Threshold Scale                           | 0.01                   |
| Deconvolution Parameters                            |                        |
| Noise Compensation                                  | True                   |
| Charge Carrier                                      | H                      |
| Negative Charge                                     | False                  |
| Source Spectra Parameters                           |                        |
| Source Spectra Method                               | Sliding Windows        |
| Sliding Windows Definition                          |                        |
| RT Range                                            | 0.430 - 3.300 minutes  |
| Target Avg Spectrum Width                           | 0.2 minutes            |
| Target Avg Spectrum Offset Scan                     | 1                      |
| Sliding Windows Merging Parameters                  |                        |
| Merge Tolerance                                     | 30 ppm                 |
| Max RT Gap                                          | 0.5 minutes            |
| Min. Number of Detected Intervals                   | 20                     |

NativeLESA\_method\_glassslide\_rat\_brain\_5pMeOH\_P4\_run8

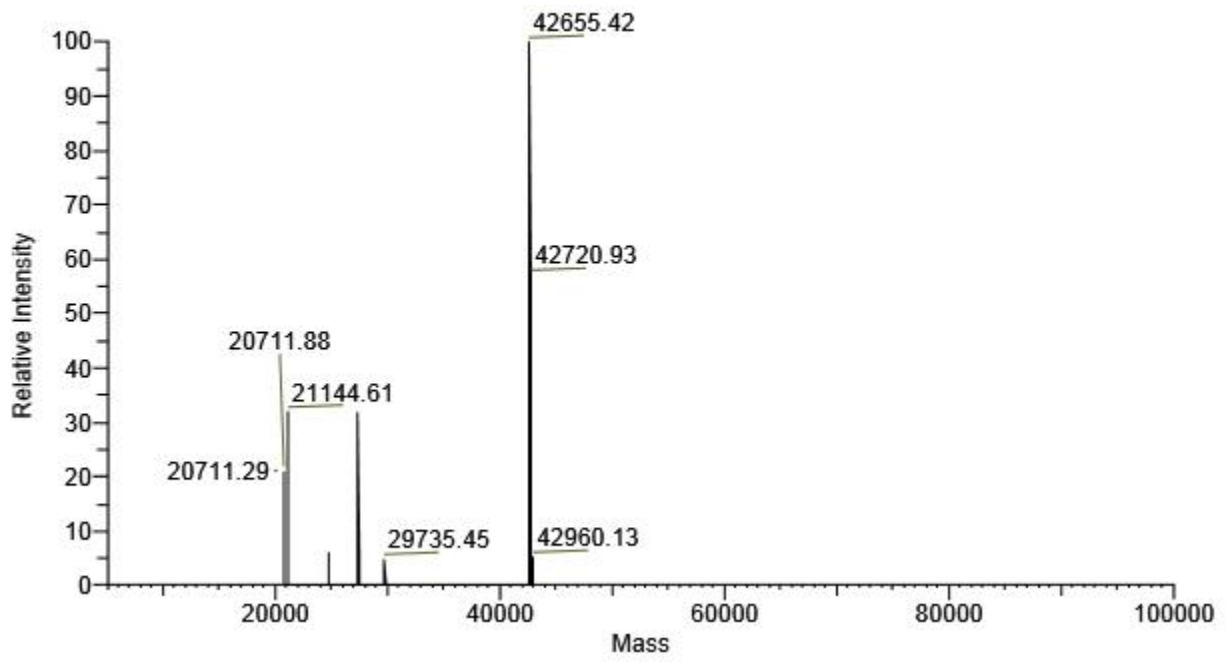

Sliding Windows ReSpect Masses Table

| Row Number | Average Mass | Sum Intensity | Relative Abundance | Fractional Abundance | Score | Number of Charge States | Charge State Distribution | Number of Detected Intervals | Mass Std Dev | PPM Std Dev | Delta Mass | Scan Range | Start Time (min) | Stop Time (min) | Apex RT |
|------------|--------------|---------------|--------------------|----------------------|-------|-------------------------|---------------------------|------------------------------|--------------|-------------|------------|------------|------------------|-----------------|---------|
| 1          | 42655.42     | 14067523.01   | 100.00             | 36.74                | 30.11 | 9                       | 8 - 16                    | 118                          | 2.21         | 51.85       | 0.00       | 27 - 152   | 0.581            | 3.285           | 1.600   |
| 2          | 42720.93     | 7994026.90    | 56.83              | 20.88                | 30.32 | 9                       | 7 - 15                    | 106                          | 1.94         | 45.42       | 65.51      | 25 - 152   | 0.538            | 3.285           | 2.158   |
| 3          | 21144.61     | 4472423.83    | 31.79              | 11.68                | 20.62 | 4                       | 5 - 8                     | 70                           | 1.00         | 47.18       | -21510.81  | 20 - 114   | 0.430            | 2.469           | 0.527   |
| 4          | 27375.41     | 4450148.04    | 31.63              | 11.62                | 20.75 | 6                       | 5 - 10                    | 101                          | 1.43         | 52.15       | -15280.01  | 23 - 151   | 0.495            | 3.263           | 2.008   |
| 5          | 20711.88     | 1667804.98    | 11.86              | 4.36                 | 21.42 | 4                       | 5 - 8                     | 35                           | 1.09         | 52.44       | -21943.53  | 24 - 112   | 0.516            | 2.426           | 0.785   |
| 6          | 20711.29     | 1260771.74    | 8.96               | 3.29                 | 19.72 | 4                       | 5 - 8                     | 42                           | 1.39         | 67.09       | -21944.13  | 20 - 149   | 0.430            | 3.220           | 1.986   |
| 7          | 21121.87     | 862100.36     | 6.13               | 2.25                 | 22.92 | 4                       | 5 - 8                     | 21                           | 1.34         | 63.53       | -21533.55  | 20 - 59    | 0.430            | 1.289           | 1.042   |
| 8          | 24798.65     | 828510.80     | 5.89               | 2.16                 | 17.83 | 4                       | 6 - 9                     | 22                           | 1.90         | 76.68       | -17856.77  | 21 - 82    | 0.452            | 1.783           | 0.591   |
| 9          | 21162.61     | 779314.56     | 5.54               | 2.04                 | 21.99 | 4                       | 5 - 8                     | 24                           | 1.33         | 62.80       | -21492.80  | 20 - 65    | 0.430            | 1.418           | 1.042   |
| 10         | 42960.13     | 727514.64     | 5.17               | 1.90                 | 23.23 | 7                       | 8 - 14                    | 22                           | 3.07         | 71.43       | 304.71     | 41 - 149   | 0.881            | 3.220           | 1.493   |
| 11         | 29735.45     | 648545.36     | 4.61               | 1.69                 | 20.96 | 6                       | 7 - 12                    | 24                           | 2.39         | 80.43       | -12919.97  | 22 - 99    | 0.473            | 2.147           | 0.978   |
| 12         | 42784.83     | 534673.34     | 3.80               | 1.40                 | 26.27 | 7                       | 9 - 15                    | 21                           | 3.19         | 74.64       | 129.42     | 102 - 152  | 2.190            | 3.285           | 2.866   |

**Supplemental File 5:** Biopharma Finder search parameters and outputs for LESA mass spectrum shown in Fig 2A. (Kidney outer cortex, 10 mM ammonium acetate, 0.125% C8E4).

# BioPharma Finder Report

Created: 08/04/2019 13:52:58

## Sample Information

|                       |                                                                 |
|-----------------------|-----------------------------------------------------------------|
| Raw File Name         | C:\Xcalibur\Data\ms2LESA\NativeLESA_undosed_rat_kidney_run5.RAW |
| Instrument Method     |                                                                 |
| Vial                  |                                                                 |
| Injection Volume (µL) | 0                                                               |
| Sample Weight         | 0                                                               |
| Sample Volume (µL)    | 0                                                               |
| ISTD Amount           | 0                                                               |
| Dil Factor            | 0                                                               |

## Chromatogram Parameters

|                              |                       |
|------------------------------|-----------------------|
| Use Restricted Time          | False                 |
| Time Limits                  | 0.023 - 7.169 minutes |
| Scan Range                   | 1 - 334               |
| m/z Range                    | 2000 - 20000          |
| Chromatogram Trace Type      | TIC                   |
| Sensitivity                  | High                  |
| Rel. Intensity Threshold (%) | 1                     |

## Chromatogram

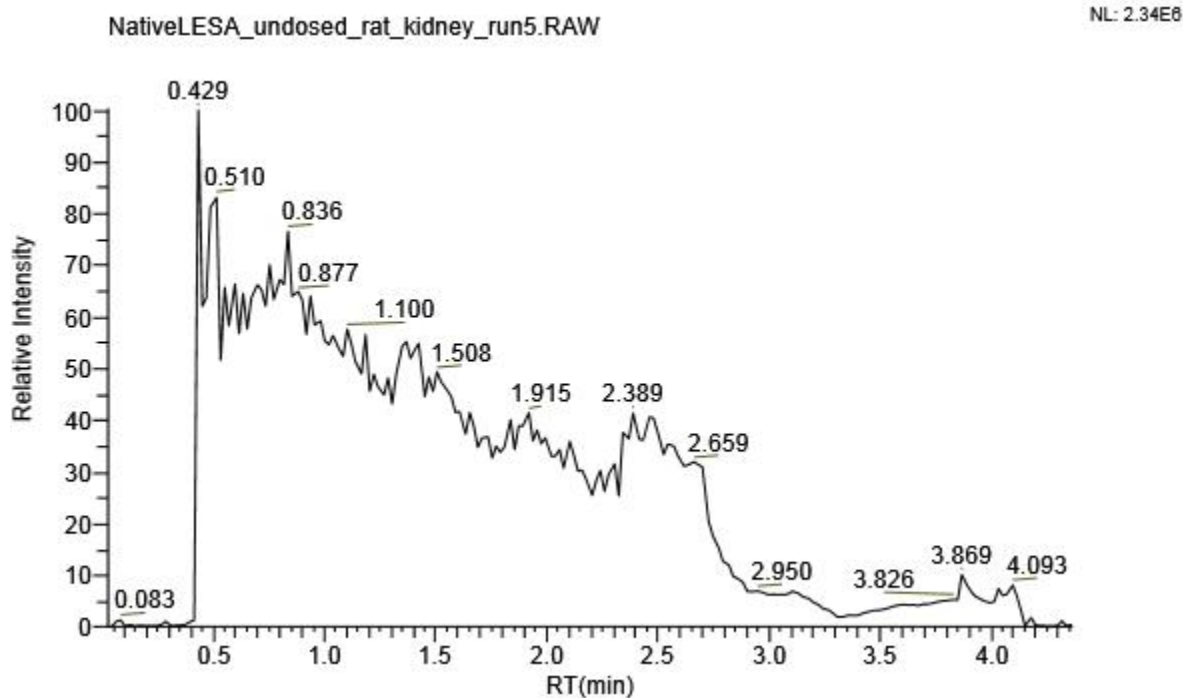

| Main Parameters ( ReSpect™ )                        |                        |
|-----------------------------------------------------|------------------------|
| Deconvolution Results Filter                        |                        |
| Output Mass Range                                   | 5000 - 100000          |
| Deconvoluted Spectra Display Mode                   | Isotopic Profile (new) |
| Charge State Distribution                           |                        |
| Deconvolution Mass Tolerance                        | 30 ppm                 |
| Choice of Peak Model                                |                        |
| Choice of Peak Model                                | Intact Protein         |
| Resolution at 400 m/z                               |                        |
| Raw File Specific                                   | 6187                   |
| Generate XIC for Each Component                     |                        |
| Calculate XIC                                       | False                  |
| Advanced Parameters ( ReSpect™ )                    |                        |
| Charge State Distribution                           |                        |
| Model Mass Range                                    | 10000 - 120000         |
| Charge State Range                                  | 5 - 40                 |
| Minimum Adjacent Charges<br>(low & high model mass) | 3 - 3                  |
| Noise Parameters                                    |                        |
| Rel. Abundance Threshold (%)                        | 15                     |
| Deconvolution Quality                               |                        |
| Quality Score Threshold                             | 0                      |
| Choice of Peak Model                                |                        |
| Target Mass                                         | 120000 Da              |
| Peak Model Parameters                               |                        |
| Number of Peak Models                               | 1                      |
| Left/Right Peak Shape                               | 2:2                    |
| Peak Filter Parameters                              |                        |
| Peak Detection Minimum Significance Measure         | 1 Standard Deviations  |
| Peak Detection Quality Measure                      | 95%                    |
| Specialized Parameters                              |                        |
| Peak Model Width Factor                             | 1                      |
| Intensity Threshold Scale                           | 0.01                   |
| Deconvolution Parameters                            |                        |
| Noise Compensation                                  | True                   |
| Charge Carrier                                      | H                      |
| Negative Charge                                     | False                  |
| Source Spectra Parameters                           |                        |
| Source Spectra Method                               | Sliding Windows        |
| Sliding Windows Definition                          |                        |
| RT Range                                            | 0.440 - 3.000 minutes  |
| Target Avg Spectrum Width                           | 0.2 minutes            |
| Target Avg Spectrum Offset Scan                     | 1                      |
| Sliding Windows Merging Parameters                  |                        |
| Merge Tolerance                                     | 30 ppm                 |
| Max RT Gap                                          | 0.5 minutes            |
| Min. Number of Detected Intervals                   | 40                     |

NativeLESA\_undosed\_rat\_kidney\_run5

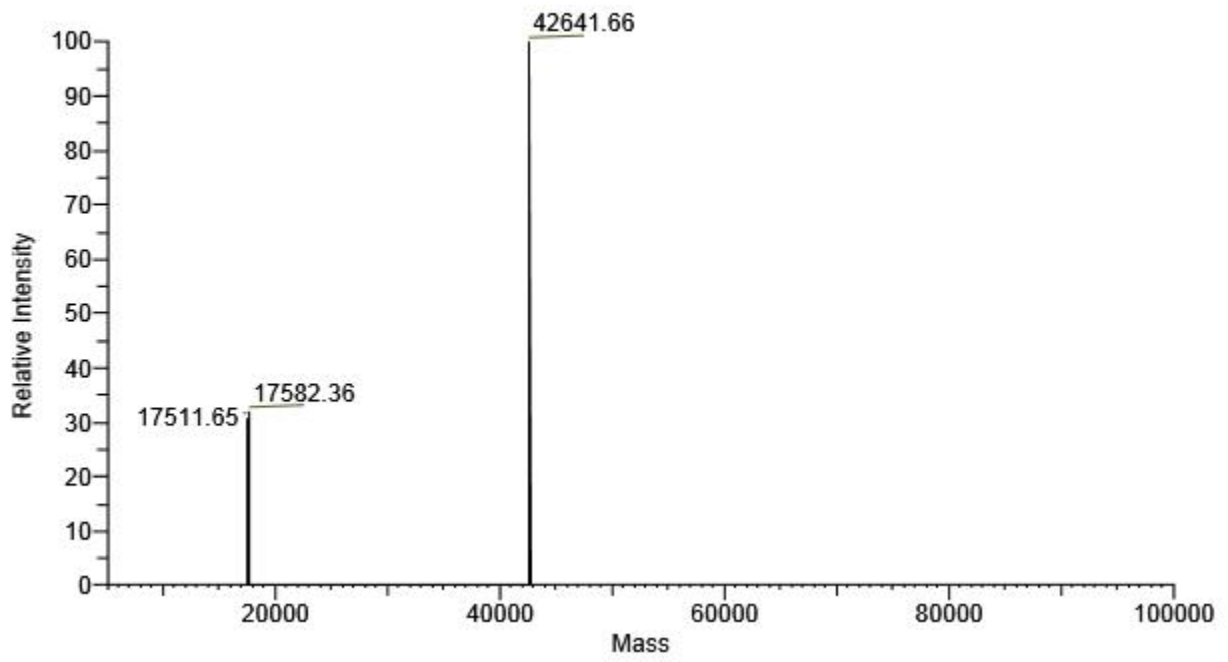



Sliding Windows ReSpect Masses Table

| Row Number | Average Mass | Sum Intensity | Relative Abundance | Fractional Abundance | Score | Number of Charge States | Charge State Distribution | Number of Detected Intervals | Mass Std Dev | PPM Std Dev | Delta Mass | Scan Range | Start Time (min) | Stop Time (min) | Apex RT |
|------------|--------------|---------------|--------------------|----------------------|-------|-------------------------|---------------------------|------------------------------|--------------|-------------|------------|------------|------------------|-----------------|---------|
| 1          | 42641.66     | 29486568.19   | 100.00             | 61.60                | 25.46 | 10                      | 6 - 15                    | 114                          | 1.58         | 37.01       | 0.00       | 22 - 143   | 0.449            | 2.995           | 0.815   |
| 2          | 17582.36     | 9383396.46    | 31.82              | 19.60                | 19.18 | 3                       | 5 - 7                     | 73                           | 0.59         | 33.58       | -25059.30  | 22 - 104   | 0.449            | 2.139           | 1.426   |
| 3          | 17511.65     | 9001058.95    | 30.53              | 18.80                | 17.51 | 3                       | 5 - 7                     | 59                           | 0.40         | 22.94       | -25130.01  | 22 - 89    | 0.449            | 1.833           | 1.447   |

**Supplemental File 6:** Biopharma Finder search parameters and outputs for LESA mass spectrum shown in Suppl Fig 3. (Kidney outer cortex, 10 mM ammonium acetate, 5% MeOH).

# BioPharma Finder Report

Created: 08/04/2019 14:03:48

## Sample Information

|                       |                                                                                                      |
|-----------------------|------------------------------------------------------------------------------------------------------|
| Raw File Name         | C:\Xcalibur\Data\ms2LESA\NativeLESA_method_glassslide_undosed_kidney_5pMeOH_P4_run1_181107142027.RAW |
| Instrument Method     |                                                                                                      |
| Vial                  |                                                                                                      |
| Injection Volume (µL) | 0                                                                                                    |
| Sample Weight         | 0                                                                                                    |
| Sample Volume (µL)    | 0                                                                                                    |
| ISTD Amount           | 0                                                                                                    |
| Dil Factor            | 0                                                                                                    |

## Chromatogram Parameters

|                              |                       |
|------------------------------|-----------------------|
| Use Restricted Time          | False                 |
| Time Limits                  | 0.023 - 7.169 minutes |
| Scan Range                   | 1 - 334               |
| m/z Range                    | 400 - 20000           |
| Chromatogram Trace Type      | TIC                   |
| Sensitivity                  | High                  |
| Rel. Intensity Threshold (%) | 1                     |

## Chromatogram

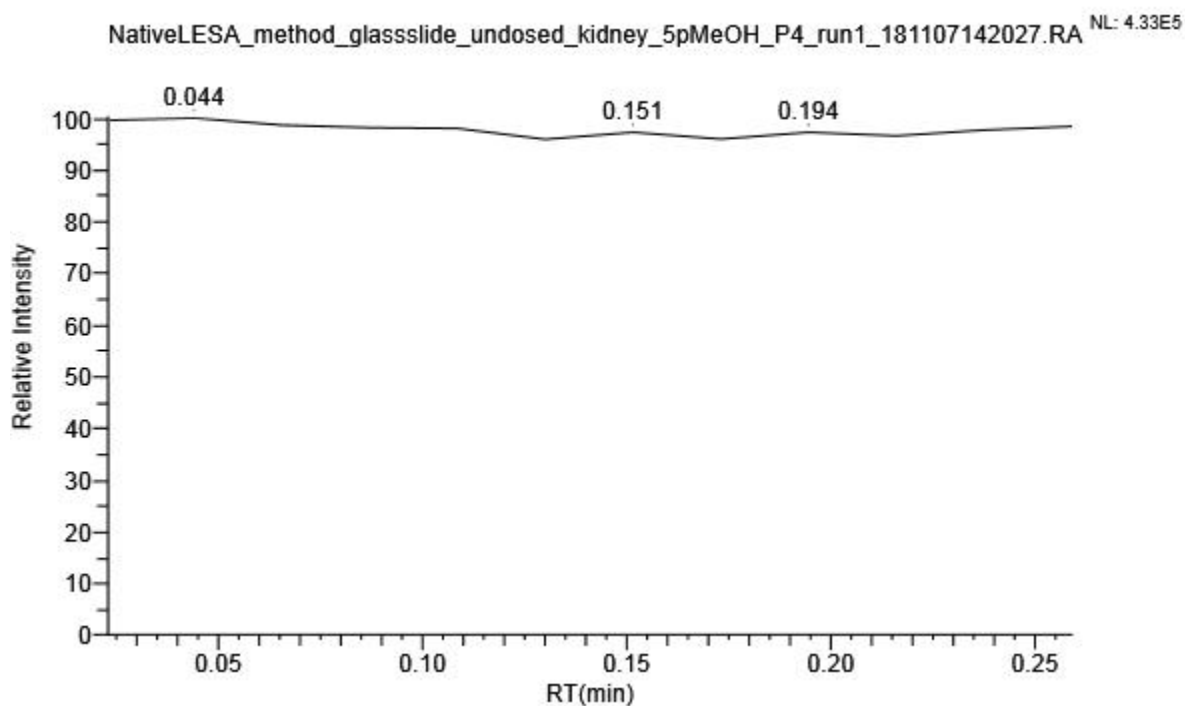

## Main Parameters ( ReSpect™ )

|                                   |                        |
|-----------------------------------|------------------------|
| Deconvolution Results Filter      |                        |
| Output Mass Range                 | 5000 - 100000          |
| Deconvoluted Spectra Display Mode | Isotopic Profile (new) |
| Charge State Distribution         |                        |
| Deconvolution Mass Tolerance      | 30 ppm                 |
| Choice of Peak Model              |                        |
| Choice of Peak Model              | Intact Protein         |
| Resolution at 400 m/z             |                        |
| Raw File Specific                 | 6187                   |
| Generate XIC for Each Component   |                        |
| Calculate XIC                     | False                  |

## Advanced Parameters ( ReSpect™ )

|                                                     |                       |
|-----------------------------------------------------|-----------------------|
| Charge State Distribution                           |                       |
| Model Mass Range                                    | 10000 - 120000        |
| Charge State Range                                  | 5 - 40                |
| Minimum Adjacent Charges<br>(low & high model mass) | 3 - 3                 |
| Noise Parameters                                    |                       |
| Rel. Abundance Threshold (%)                        | 15                    |
| Deconvolution Quality                               |                       |
| Quality Score Threshold                             | 0                     |
| Choice of Peak Model                                |                       |
| Target Mass                                         | 120000 Da             |
| Peak Model Parameters                               |                       |
| Number of Peak Models                               | 1                     |
| Left/Right Peak Shape                               | 2:2                   |
| Peak Filter Parameters                              |                       |
| Peak Detection Minimum Significance Measure         | 1 Standard Deviations |
| Peak Detection Quality Measure                      | 95%                   |
| Specialized Parameters                              |                       |
| Peak Model Width Factor                             | 1                     |
| Intensity Threshold Scale                           | 0.01                  |
| Deconvolution Parameters                            |                       |
| Noise Compensation                                  | True                  |
| Charge Carrier                                      | H                     |
| Negative Charge                                     | False                 |

## Source Spectra Parameters

|                                    |                       |
|------------------------------------|-----------------------|
| Source Spectra Method              | Sliding Windows       |
| Sliding Windows Definition         |                       |
| RT Range                           | 0.020 - 0.260 minutes |
| Target Avg Spectrum Width          | 0.05 minutes          |
| Target Avg Spectrum Offset Scan    | 1                     |
| Sliding Windows Merging Parameters |                       |
| Merge Tolerance                    | 30 ppm                |
| Max RT Gap                         | 0.5 minutes           |
| Min. Number of Detected Intervals  | 3                     |

NativeLESA\_method\_glassslide\_undosed\_kidney\_5pMeOH\_P4\_run1\_181107142027

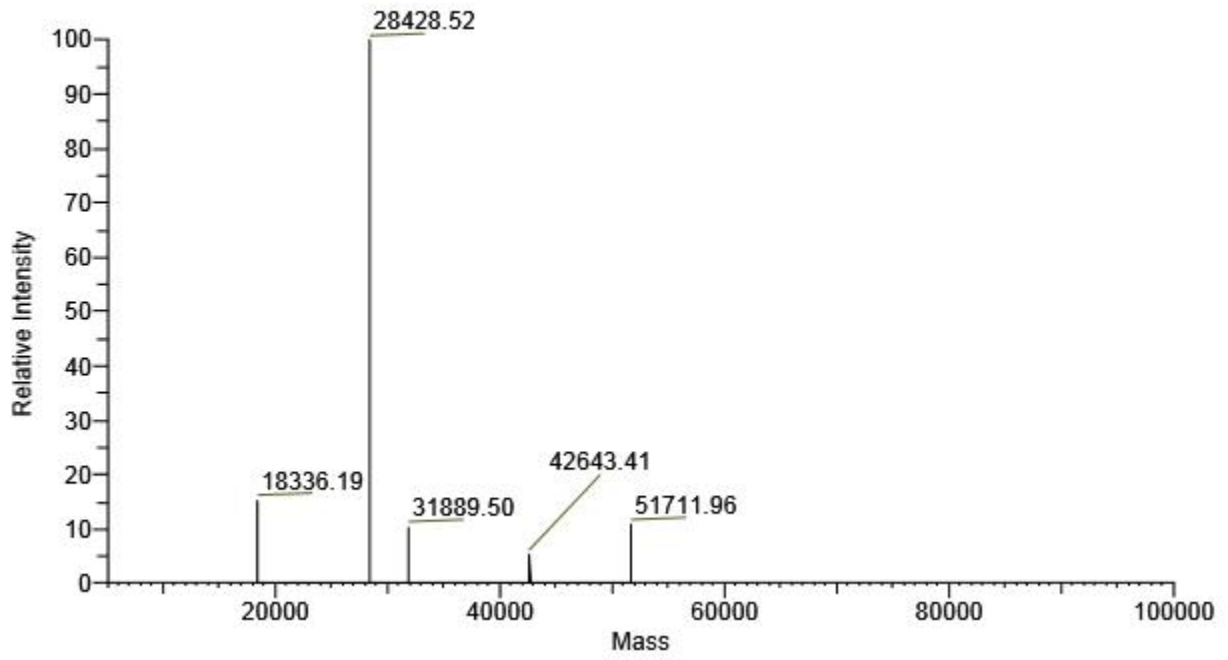

Sliding Windows ReSpec Masses Table

| Row Number | Average Mass | Sum Intensity | Relative Abundance | Fractional Abundance | Score | Number of Charge States | Charge State Distribution | Number of Detected Intervals | Mass Std Dev | PPM Std Dev | Delta Mass | Scan Range | Start Time (min) | Stop Time (min) | Apex RT |
|------------|--------------|---------------|--------------------|----------------------|-------|-------------------------|---------------------------|------------------------------|--------------|-------------|------------|------------|------------------|-----------------|---------|
| 1          | 28428.52     | 1711541.75    | 100.00             | 70.77                | 23.86 | 4                       | 5 - 8                     | 9                            | 0.60         | 20.96       | 0.00       | 1 - 10     | 0.023            | 0.237           | 0.130   |
| 2          | 18336.19     | 257555.72     | 15.05              | 10.65                | 16.77 | 3                       | 6 - 8                     | 8                            | 1.70         | 92.50       | -10092.33  | 1 - 10     | 0.023            | 0.237           | 0.173   |
| 3          | 51711.96     | 186325.26     | 10.89              | 7.70                 | 26.05 | 5                       | 13 - 17                   | 6                            | 2.03         | 39.30       | 23283.44   | 4 - 10     | 0.087            | 0.237           | 0.216   |
| 4          | 31889.50     | 174095.60     | 10.17              | 7.20                 | 15.17 | 3                       | 10 - 12                   | 6                            | 1.65         | 51.75       | 3460.98    | 1 - 8      | 0.023            | 0.194           | 0.087   |
| 5          | 42643.41     | 88801.55      | 5.19               | 3.67                 | 21.36 | 4                       | 12 - 15                   | 3                            | 2.52         | 59.05       | 14214.88   | 1 - 8      | 0.023            | 0.194           | 0.173   |

**Supplemental File 7:** Biopharma Finder search parameters and outputs for LESA mass spectrum shown in Fig 2C. (Kidney medulla, 10 mM ammonium acetate, 0.125% C8E4).

# BioPharma Finder Report

Created: 08/04/2019 14:41:38

## Sample Information

|                       |                                                                 |
|-----------------------|-----------------------------------------------------------------|
| Raw File Name         | C:\Xcalibur\Data\ms2LESA\NativeLESA_undosed_rat_kidney_run9.RAW |
| Instrument Method     |                                                                 |
| Vial                  |                                                                 |
| Injection Volume (µL) | 0                                                               |
| Sample Weight         | 0                                                               |
| Sample Volume (µL)    | 0                                                               |
| ISTD Amount           | 0                                                               |
| Dil Factor            | 0                                                               |

## Chromatogram Parameters

|                              |                       |
|------------------------------|-----------------------|
| Use Restricted Time          | False                 |
| Time Limits                  | 0.023 - 7.169 minutes |
| Scan Range                   | 1 - 334               |
| m/z Range                    | 2000 - 20000          |
| Chromatogram Trace Type      | TIC                   |
| Sensitivity                  | High                  |
| Rel. Intensity Threshold (%) | 1                     |

## Chromatogram

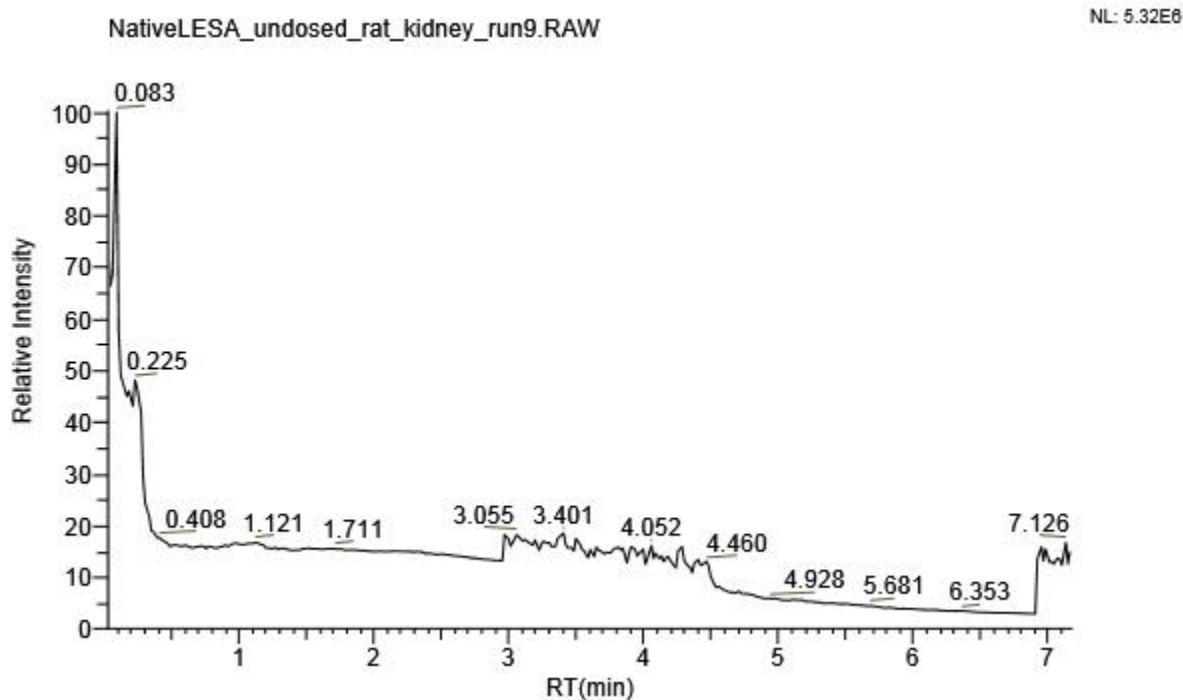



## Main Parameters ( ReSpect™ )

|                                   |                        |
|-----------------------------------|------------------------|
| Deconvolution Results Filter      |                        |
| Output Mass Range                 | 5000 - 100000          |
| Deconvoluted Spectra Display Mode | Isotopic Profile (new) |
| Charge State Distribution         |                        |
| Deconvolution Mass Tolerance      | 25 ppm                 |
| Choice of Peak Model              |                        |
| Choice of Peak Model              | Intact Protein         |
| Resolution at 400 m/z             |                        |
| Raw File Specific                 | 6187                   |
| Generate XIC for Each Component   |                        |
| Calculate XIC                     | False                  |

## Advanced Parameters ( ReSpect™ )

|                                                     |                       |
|-----------------------------------------------------|-----------------------|
| Charge State Distribution                           |                       |
| Model Mass Range                                    | 10000 - 120000        |
| Charge State Range                                  | 5 - 40                |
| Minimum Adjacent Charges<br>(low & high model mass) | 3 - 3                 |
| Noise Parameters                                    |                       |
| Rel. Abundance Threshold (%)                        | 15                    |
| Deconvolution Quality                               |                       |
| Quality Score Threshold                             | 0                     |
| Choice of Peak Model                                |                       |
| Target Mass                                         | 120000 Da             |
| Peak Model Parameters                               |                       |
| Number of Peak Models                               | 1                     |
| Left/Right Peak Shape                               | 2:2                   |
| Peak Filter Parameters                              |                       |
| Peak Detection Minimum Significance Measure         | 1 Standard Deviations |
| Peak Detection Quality Measure                      | 95%                   |
| Specialized Parameters                              |                       |
| Peak Model Width Factor                             | 1                     |
| Intensity Threshold Scale                           | 0.01                  |
| Deconvolution Parameters                            |                       |
| Noise Compensation                                  | True                  |
| Charge Carrier                                      | H                     |
| Negative Charge                                     | False                 |

## Source Spectra Parameters

|                                    |                       |
|------------------------------------|-----------------------|
| Source Spectra Method              | Sliding Windows       |
| Sliding Windows Definition         |                       |
| RT Range                           | 0.300 - 3.300 minutes |
| Target Avg Spectrum Width          | 0.2 minutes           |
| Target Avg Spectrum Offset Scan    | 1                     |
| Sliding Windows Merging Parameters |                       |
| Merge Tolerance                    | 30 ppm                |
| Max RT Gap                         | 0.5 minutes           |
| Min. Number of Detected Intervals  | 40                    |

## NativeLESA\_undosed\_rat\_kidney\_run9

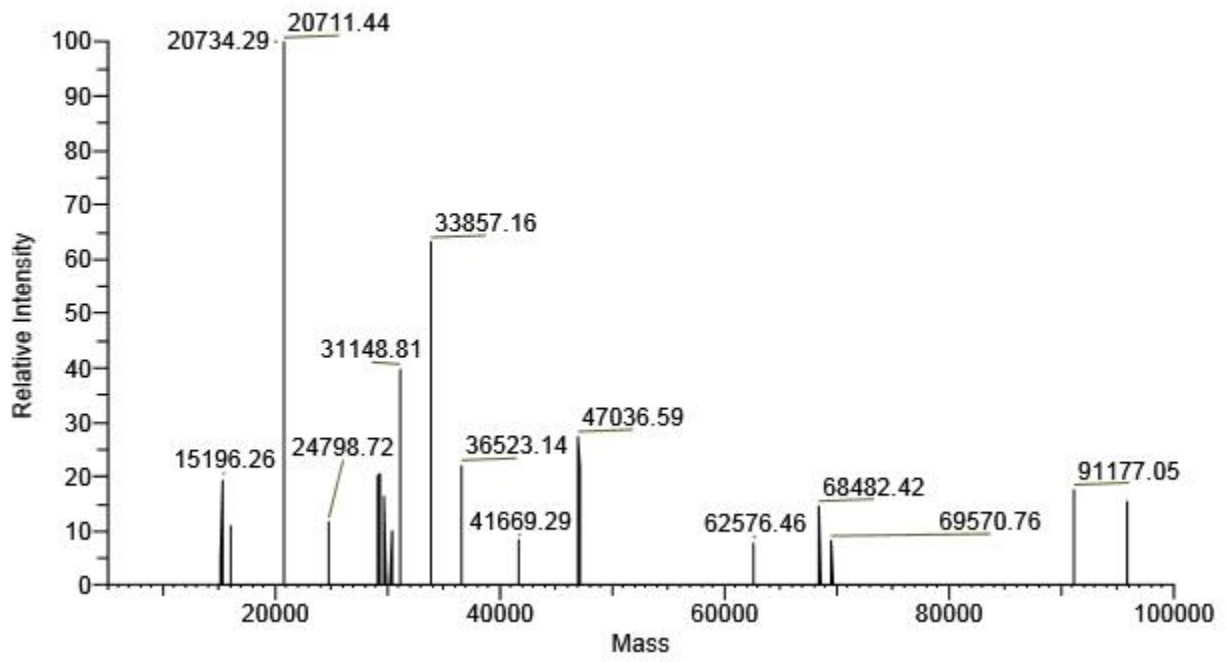

Sliding Windows ReSpect Masses Table

| Row Number | Average Mass | Sum Intensity | Relative Abundance | Fractional Abundance | Score | Number of Charge States | Charge State Distribution | Number of Detected Intervals | Mass Std Dev | PPM Std Dev | Delta Mass | Scan Range | Start Time (min) | Stop Time (min) | Apex RT |
|------------|--------------|---------------|--------------------|----------------------|-------|-------------------------|---------------------------|------------------------------|--------------|-------------|------------|------------|------------------|-----------------|---------|
| 1          | 20711.44     | 19849421.89   | 100.00             | 22.00                | 22.63 | 4                       | 5 - 8                     | 138                          | 0.63         | 30.29       | 0.00       | 15 - 161   | 0.307            | 3.299           | 2.383   |
| 2          | 33857.16     | 12522848.07   | 63.09              | 13.88                | 23.91 | 6                       | 7 - 12                    | 137                          | 1.55         | 45.76       | 13145.73   | 16 - 161   | 0.327            | 3.299           | 2.200   |
| 3          | 47036.59     | 5397511.39    | 27.19              | 5.98                 | 24.33 | 6                       | 9 - 14                    | 107                          | 3.48         | 73.91       | 26325.15   | 40 - 161   | 0.815            | 3.299           | 2.749   |
| 4          | 20734.29     | 5151119.87    | 25.95              | 5.71                 | 18.78 | 4                       | 5 - 8                     | 99                           | 0.43         | 20.74       | 22.86      | 23 - 146   | 0.469            | 2.994           | 2.037   |
| 5          | 31148.81     | 5146309.42    | 25.93              | 5.70                 | 21.48 | 5                       | 7 - 11                    | 85                           | 2.07         | 66.36       | 10437.37   | 16 - 161   | 0.327            | 3.299           | 1.854   |
| 6          | 36523.14     | 4335162.62    | 21.84              | 4.80                 | 15.54 | 3                       | 11 - 13                   | 100                          | 1.07         | 29.29       | 15811.70   | 35 - 160   | 0.714            | 3.279           | 1.039   |
| 7          | 29206.24     | 4050590.31    | 20.41              | 4.49                 | 26.29 | 5                       | 6 - 10                    | 109                          | 1.68         | 57.39       | 8494.81    | 25 - 161   | 0.510            | 3.299           | 2.403   |
| 8          | 15196.26     | 3813644.23    | 19.21              | 4.23                 | 17.10 | 3                       | 5 - 7                     | 102                          | 0.58         | 38.46       | -5515.18   | 17 - 154   | 0.347            | 3.157           | 2.403   |
| 9          | 91177.05     | 3467631.17    | 17.47              | 3.84                 | 22.89 | 4                       | 29 - 32                   | 93                           | 4.21         | 46.19       | 70465.61   | 27 - 155   | 0.551            | 3.177           | 1.670   |
| 10         | 29326.39     | 3235284.87    | 16.30              | 3.59                 | 23.00 | 5                       | 6 - 10                    | 93                           | 1.86         | 63.57       | 8614.96    | 33 - 161   | 0.673            | 3.299           | 3.116   |
| 11         | 29735.99     | 3232881.38    | 16.29              | 3.58                 | 15.26 | 6                       | 6 - 12                    | 55                           | 1.69         | 56.70       | 9024.55    | 35 - 147   | 0.714            | 3.014           | 1.691   |
| 12         | 95852.40     | 3050618.05    | 15.37              | 3.38                 | 15.62 | 4                       | 24 - 27                   | 65                           | 5.02         | 52.41       | 75140.96   | 40 - 150   | 0.815            | 3.075           | 1.752   |
| 13         | 31146.56     | 2932689.72    | 14.77              | 3.25                 | 25.64 | 6                       | 6 - 11                    | 43                           | 2.38         | 76.49       | 10435.13   | 42 - 159   | 0.856            | 3.258           | 2.342   |
| 14         | 68482.42     | 2868304.85    | 14.45              | 3.18                 | 18.49 | 3                       | 17 - 19                   | 78                           | 2.36         | 34.43       | 47770.98   | 15 - 106   | 0.307            | 2.179           | 0.673   |
| 15         | 24798.72     | 2298792.11    | 11.58              | 2.55                 | 18.71 | 4                       | 6 - 9                     | 77                           | 1.04         | 42.02       | 4087.28    | 23 - 158   | 0.469            | 3.238           | 1.284   |
| 16         | 15952.35     | 2157903.03    | 10.87              | 2.39                 | 20.72 | 3                       | 5 - 7                     | 74                           | 0.46         | 28.75       | -4759.09   | 58 - 158   | 1.182            | 3.238           | 2.403   |
| 17         | 30305.48     | 1965608.27    | 9.90               | 2.18                 | 20.90 | 7                       | 6 - 12                    | 58                           | 1.44         | 47.64       | 9594.05    | 43 - 150   | 0.877            | 3.075           | 2.485   |
| 18         | 41669.29     | 1640651.37    | 8.27               | 1.82                 | 22.08 | 5                       | 8 - 12                    | 54                           | 2.92         | 69.97       | 20957.86   | 18 - 147   | 0.368            | 3.014           | 1.956   |
| 19         | 69570.76     | 1610236.26    | 8.11               | 1.78                 | 14.18 | 3                       | 21 - 23                   | 46                           | 5.44         | 78.18       | 48859.32   | 66 - 146   | 1.345            | 2.994           | 2.729   |
| 20         | 62576.46     | 1514752.34    | 7.63               | 1.68                 | 14.13 | 4                       | 15 - 18                   | 49                           | 4.11         | 65.69       | 41865.02   | 15 - 160   | 0.307            | 3.279           | 1.548   |

**Supplemental File 8:** Biopharma Finder search parameters and outputs for LESA mass spectrum obtained from a separate medulla location. (Kidney medulla, 10 mM ammonium acetate, 0.125% C8E4).

# BioPharma Finder Report

Created: 08/04/2019 14:48:25

## Sample Information

|                       |                                                                 |
|-----------------------|-----------------------------------------------------------------|
| Raw File Name         | C:\Xcalibur\Data\ms2LESA\NativeLESA_undosed_rat_kidney_run3.RAW |
| Instrument Method     |                                                                 |
| Vial                  |                                                                 |
| Injection Volume (µL) | 0                                                               |
| Sample Weight         | 0                                                               |
| Sample Volume (µL)    | 0                                                               |
| ISTD Amount           | 0                                                               |
| Dil Factor            | 0                                                               |

## Chromatogram Parameters

|                              |                       |
|------------------------------|-----------------------|
| Use Restricted Time          | False                 |
| Time Limits                  | 0.023 - 7.169 minutes |
| Scan Range                   | 1 - 334               |
| m/z Range                    | 2000 - 20000          |
| Chromatogram Trace Type      | TIC                   |
| Sensitivity                  | High                  |
| Rel. Intensity Threshold (%) | 1                     |

## Chromatogram

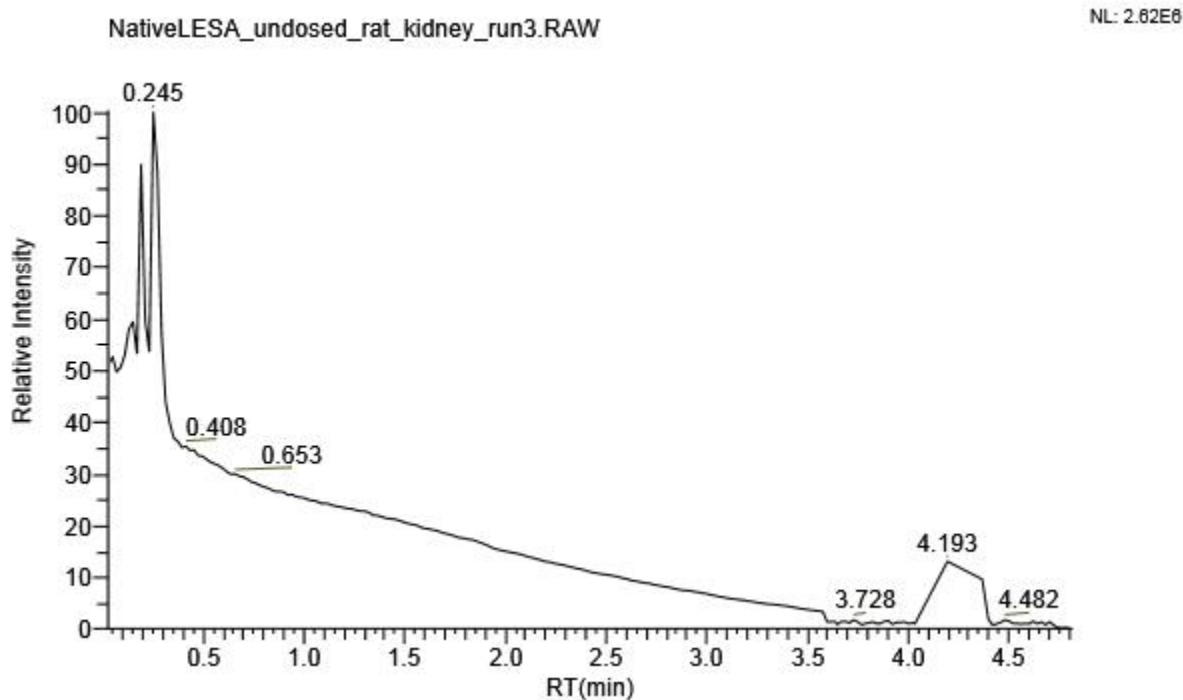

## Main Parameters ( ReSpect™ )

|                                   |                        |
|-----------------------------------|------------------------|
| Deconvolution Results Filter      |                        |
| Output Mass Range                 | 5000 - 100000          |
| Deconvoluted Spectra Display Mode | Isotopic Profile (new) |
| Charge State Distribution         |                        |
| Deconvolution Mass Tolerance      | 30 ppm                 |
| Choice of Peak Model              |                        |
| Choice of Peak Model              | Intact Protein         |
| Resolution at 400 m/z             |                        |
| Raw File Specific                 | 6187                   |
| Generate XIC for Each Component   |                        |
| Calculate XIC                     | False                  |

## Advanced Parameters ( ReSpect™ )

|                                                     |                       |
|-----------------------------------------------------|-----------------------|
| Charge State Distribution                           |                       |
| Model Mass Range                                    | 10000 - 120000        |
| Charge State Range                                  | 5 - 40                |
| Minimum Adjacent Charges<br>(low & high model mass) | 3 - 3                 |
| Noise Parameters                                    |                       |
| Rel. Abundance Threshold (%)                        | 15                    |
| Deconvolution Quality                               |                       |
| Quality Score Threshold                             | 0                     |
| Choice of Peak Model                                |                       |
| Target Mass                                         | 120000 Da             |
| Peak Model Parameters                               |                       |
| Number of Peak Models                               | 1                     |
| Left/Right Peak Shape                               | 2:2                   |
| Peak Filter Parameters                              |                       |
| Peak Detection Minimum Significance Measure         | 1 Standard Deviations |
| Peak Detection Quality Measure                      | 95%                   |
| Specialized Parameters                              |                       |
| Peak Model Width Factor                             | 1                     |
| Intensity Threshold Scale                           | 0.01                  |
| Deconvolution Parameters                            |                       |
| Noise Compensation                                  | True                  |
| Charge Carrier                                      | H                     |
| Negative Charge                                     | False                 |

## Source Spectra Parameters

|                                    |                       |
|------------------------------------|-----------------------|
| Source Spectra Method              | Sliding Windows       |
| Sliding Windows Definition         |                       |
| RT Range                           | 0.500 - 3.000 minutes |
| Target Avg Spectrum Width          | 0.2 minutes           |
| Target Avg Spectrum Offset Scan    | 1                     |
| Sliding Windows Merging Parameters |                       |
| Merge Tolerance                    | 30 ppm                |
| Max RT Gap                         | 0.5 minutes           |
| Min. Number of Detected Intervals  | 40                    |

NativeLESA\_undosed\_rat\_kidney\_run3

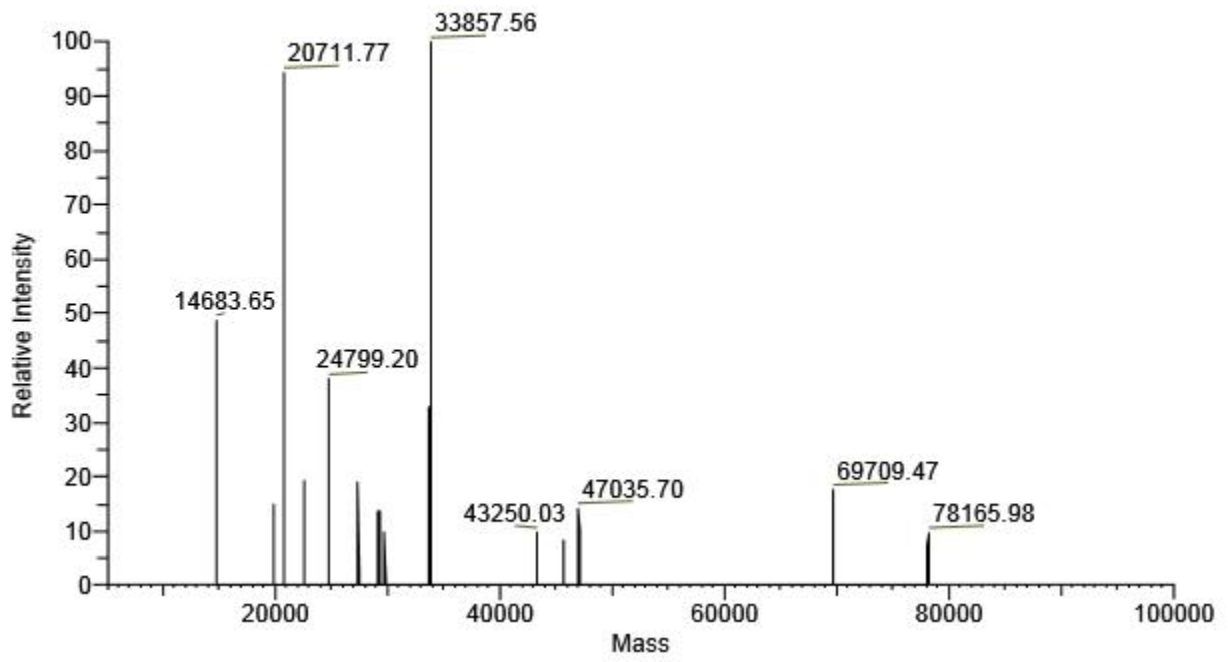

Sliding Windows ReSpect Masses Table

| Row Number | Average Mass | Sum Intensity | Relative Abundance | Fractional Abundance | Score | Number of Charge States | Charge State Distribution | Number of Detected Intervals | Mass Std Dev | PPM Std Dev | Delta Mass | Scan Range | Start Time (min) | Stop Time (min) | Apex RT |
|------------|--------------|---------------|--------------------|----------------------|-------|-------------------------|---------------------------|------------------------------|--------------|-------------|------------|------------|------------------|-----------------|---------|
| 1          | 33857.56     | 12656058.89   | 100.00             | 22.05                | 30.47 | 6                       | 7 - 12                    | 113                          | 1.29         | 38.12       | 0.00       | 25 - 146   | 0.510            | 2.994           | 0.612   |
| 2          | 20711.77     | 11932977.46   | 94.29              | 20.79                | 22.73 | 4                       | 5 - 8                     | 113                          | 0.66         | 31.82       | -13145.79  | 25 - 146   | 0.510            | 2.994           | 0.612   |
| 3          | 24799.20     | 4797751.65    | 37.91              | 8.36                 | 20.59 | 4                       | 6 - 9                     | 113                          | 0.92         | 36.92       | -9058.36   | 25 - 146   | 0.510            | 2.994           | 0.612   |
| 4          | 14683.65     | 4760163.36    | 37.61              | 8.29                 | 16.50 | 3                       | 5 - 7                     | 96                           | 0.31         | 21.36       | -19173.91  | 32 - 142   | 0.653            | 2.912           | 1.365   |
| 5          | 33716.86     | 4135550.76    | 32.68              | 7.20                 | 16.57 | 3                       | 8 - 10                    | 113                          | 1.36         | 40.36       | -140.70    | 25 - 146   | 0.510            | 2.994           | 0.938   |
| 6          | 22528.56     | 2426025.40    | 19.17              | 4.23                 | 18.05 | 4                       | 5 - 8                     | 84                           | 1.75         | 77.73       | -11329.00  | 31 - 142   | 0.632            | 2.912           | 0.917   |
| 7          | 27374.65     | 2389225.53    | 18.88              | 4.16                 | 21.79 | 4                       | 6 - 9                     | 92                           | 1.59         | 57.92       | -6482.91   | 44 - 146   | 0.897            | 2.994           | 1.935   |
| 8          | 69709.47     | 2217647.63    | 17.52              | 3.86                 | 14.49 | 3                       | 21 - 23                   | 82                           | 2.88         | 41.25       | 35851.91   | 32 - 131   | 0.653            | 2.688           | 0.917   |
| 9          | 14686.72     | 2028902.20    | 16.03              | 3.53                 | 21.67 | 3                       | 5 - 7                     | 61                           | 0.21         | 14.12       | -19170.84  | 64 - 141   | 1.304            | 2.892           | 1.691   |
| 10         | 19872.59     | 1871867.97    | 14.79              | 3.26                 | 16.39 | 3                       | 6 - 8                     | 57                           | 0.57         | 28.78       | -13984.96  | 29 - 121   | 0.592            | 2.485           | 1.650   |
| 11         | 47035.70     | 1773721.29    | 14.01              | 3.09                 | 27.78 | 6                       | 9 - 14                    | 56                           | 3.31         | 70.43       | 13178.14   | 52 - 146   | 1.060            | 2.994           | 2.017   |
| 12         | 29205.97     | 1715512.18    | 13.55              | 2.99                 | 25.04 | 5                       | 6 - 10                    | 87                           | 1.72         | 58.72       | -4651.59   | 25 - 146   | 0.510            | 2.994           | 1.365   |
| 13         | 29734.57     | 1227954.21    | 9.70               | 2.14                 | 15.04 | 3                       | 10 - 12                   | 43                           | 2.09         | 70.40       | -4122.99   | 36 - 101   | 0.734            | 2.078           | 1.019   |
| 14         | 43250.03     | 1223301.38    | 9.67               | 2.13                 | 19.46 | 3                       | 12 - 14                   | 49                           | 2.09         | 48.40       | 9392.47    | 28 - 109   | 0.571            | 2.240           | 1.162   |
| 15         | 78165.98     | 1202540.78    | 9.50               | 2.10                 | 13.95 | 3                       | 21 - 23                   | 41                           | 7.38         | 94.41       | 44308.42   | 33 - 90    | 0.673            | 1.854           | 1.162   |
| 16         | 45659.72     | 1039819.48    | 8.22               | 1.81                 | 16.80 | 3                       | 10 - 12                   | 41                           | 3.76         | 82.28       | 11802.16   | 25 - 85    | 0.510            | 1.752           | 0.612   |
